1 **Novel cholinesterase paralogs of *Schistosoma mansoni* have perceived roles in**  
2 **cholinergic signaling, glucose scavenging and drug detoxification and are essential for**  
3 **parasite survival**

4

5 Bemnet Tedla<sup>1</sup>, Javier Sotillo<sup>1,2</sup>, Darren Pickering<sup>1</sup>, Ramon M. Eichenberger<sup>1,3</sup>, Luke Becker<sup>1</sup>,  
6 Alex Loukas<sup>1</sup> and Mark S. Pearson<sup>1#</sup>.

7

8 <sup>1</sup>Centre for Molecular Therapeutics, Australian Institute of Tropical Health and Medicine,  
9 James Cook University, Cairns, Queensland, 4878, Australia.

10 <sup>2</sup>Centro Nacional de Microbiología, Instituto de Salud Carlos III, Majadahonda, Madrid,  
11 Spain.

12 <sup>3</sup>Institute of Parasitology, University of Zurich, Zurich, Switzerland

13

14

15 #Corresponding author

16 Dr Mark Pearson ([mark.pearson@jcu.edu.au](mailto:mark.pearson@jcu.edu.au))

17

18

19

20

21

22

23 **Abstract**

24 Cholinesterase (ChE) function in schistosomes is essential for orchestration of parasite  
25 neurotransmission but has been poorly defined with respect to the molecules responsible.  
26 Interrogation of the *S. mansoni* genome has revealed the presence of three ChE domain-  
27 containing genes (*Smche*)s, which we have shown to encode two functional  
28 acetylcholinesterases (AChE)s (*Smache1* – smp\_154600 and *Smache3* – smp\_136690) and a  
29 butyrylcholinesterase (BChE) (*Smbche1* – smp\_125350). Antibodies to recombinant forms of  
30 each *SmChE* localized the proteins to the tegument and neuromusculature of adults and  
31 schistosomula and developmental expression profiling differed among the three molecules,  
32 suggestive of functions extending beyond traditional cholinergic signaling. For the first time in  
33 schistosomes, we identified ChE enzymatic activity in fluke excretory/secretory (ES) products  
34 and, using proteomic approaches, attributed this activity to the presence of *SmAChE1* and  
35 *SmBChE1*. To address the hypothesis that tegumental AChE mediates exogenous glucose  
36 scavenging by the parasite, we show that RNAi-mediated knockdown of *smache1* and  
37 *smache3*, but not *smbche1*, significantly reduces glucose uptake by schistosomes. Parasite  
38 survival *in vitro* and *in vivo* was significantly impaired by silencing of each *smche*, either  
39 individually or in combination, attesting to the essential roles of these molecules. Lastly, in the  
40 first characterization study of a BChE from helminths, evidence is provided that *SmBChE1*  
41 may act as a bio-scavenger of AChE inhibitors as the addition of recombinant *SmBChE1* to  
42 parasite cultures mitigated the effect of the anti-schistosome AChE inhibitor DDVP (DDVP),  
43 whereas *smbche1*-silenced parasites displayed increased sensitivity to DDVP.

44

45

46

47

## 48 **Author summary**

49 Cholinesterases - acetylcholinesterases (AChE)s and butyrylcholinesterases (BChE)s - are  
50 multi-functional enzymes that play a pivotal role in the nervous system of parasites by  
51 regulating neurotransmission through acetylcholine hydrolysis. Herein, we provide a detailed  
52 characterization of schistosome cholinesterases using molecular, enzymatic and gene-silencing  
53 approaches and show evidence for these molecules having roles in glucose scavenging and  
54 drug detoxification, in addition to their neuronal function. Further, we demonstrate the  
55 importance of these proteins to parasite development and survival through gene knockdown  
56 experiments in laboratory animals, providing evidence for the use of these proteins in the  
57 development of novel intervention strategies against schistosomiasis.

58

## 59 **Introduction**

60 The functioning of the nervous system is a tightly regulated process controlled through multiple  
61 catalytic and non-catalytic signaling proteins. Among the catalytic molecules, cholinesterases  
62 (ChEs) play a pivotal role in regulating the signaling activity of the nervous system. There are  
63 two major types of ChEs, acetylcholinesterase (AChE) and pseudocholinesterase, or  
64 butyrylcholinesterase (BChE), and they can be distinguished both kinetically and  
65 pharmacologically [1]. AChE selectively hydrolyzes the neurotransmitter acetylcholine (ACh)  
66 to maintain neurotransmitter homeostasis [2] while the main role of BChE is widely accepted  
67 to be the detoxification of organophosphorus esters which are inhibitors of AChE [3]. ChEs  
68 are generally believed to be functionally redundant in cholinergic signaling with the main  
69 differences between paralogs lying in their spatial and temporal expression as well as non-  
70 cholinergic functionality [4, 5].

71

72 The nervous system of helminths has long been a potential target for therapeutic agents as it  
73 plays several crucial roles in parasite biology that are fundamental to survival, including  
74 coordinating motility within and outside of the host, feeding and reproduction [6-10]. The  
75 *Schistosoma* nervous system is particularly important in this respect as this parasite lacks a  
76 body cavity and circulating body fluid [11, 12] and, as a result, its signaling functions are  
77 chiefly achieved via neurotransmission. The primary neurotransmitter that schistosomes utilize  
78 is acetylcholine (ACh), which allows muscle contraction. The physiological concentration of  
79 ACh, however, must be maintained otherwise it triggers paralysis and this is achieved  
80 primarily through the action of AChE [6-8].

81

82 While AChE activity has been documented extensively in *S. mansoni* (reviewed in [13]), most  
83 of the work has involved studies on parasite extracts or native *SmChE* purified by inhibitor-  
84 affinity chromatography, making it difficult to attribute function to any one particular *SmChE*  
85 molecule. Further, more recent, but still “pre-genomic”, studies have documented only one  
86 AChE-encoding gene in *S. mansoni* and other species [14, 15]. In 2016, You *et al.* characterized  
87 AChE activity in *S. japonicum* extracts and at a molecular level, but only through the  
88 expression of one recombinant AChE [16]. Moreover, to the best of our knowledge, genes  
89 encoding proteins with BChE activity have not been previously described in schistosomes or  
90 any other helminth. Interrogation of the now fully annotated *S. mansoni* genome [17] has  
91 revealed three different *SmChE* paralogs; however, their individual contributions to ChE  
92 function remain unknown.

93

94 Traditionally, ChEs have been regarded solely as neurotransmitter terminators; however, there  
95 is increasing data to suggest that these enzymes play a variety of roles that extend beyond this  
96 cholinergic function due to their presence in multiple cell types and subcellular locations [4, 5,

97 18, 19]. In schistosomes, AChE has been localized to the tegument as well as the  
98 neuromusculature [16, 20, 21] and a proposed function for tegumental AChE has been  
99 mediation of glucose uptake by the parasite from the external environment [22]. The exact  
100 mechanism for this process is still unclear but the proposed initiating step is by limiting the  
101 interaction of host ACh with tegumental nicotinic ACh receptors (nAChRs), a hypothesis  
102 bolstered by the observation that glucose uptake is ablated by the use of membrane-  
103 impermeable AChE and nAChR inhibitors in *S. mansoni* [22, 23] and RNAi-mediated AChE  
104 silencing in *S. japonicum* [24]. The nAChRs are also associated both spatially and temporally  
105 with surface AChE expression and are concentrated on the tegument [25], the major site of  
106 glucose uptake [26].

107

108 Many intestinal nematodes secrete AChE [27-30], which, where studied, orchestrate  
109 exogenous cholinergic activities. It has also been indirectly shown that the nematode *N.*  
110 *brasiliensis* employs parasite-derived AChE to alter the host cytokine environment to inhibit  
111 M2 macrophage recruitment, a condition favorable to worm survival [31]. Despite this breadth  
112 of literature in nematodes, there has been no documentation of secreted AChE activity from  
113 schistosomes.

114

115 Herein we describe and functionally characterize using gene silencing and enzymatic  
116 approaches, a novel AChE and BChE from *S. mansoni* and further characterize the only  
117 previously identified AChE-encoding gene from the parasite. Importantly, we show through  
118 gene knockdown that each *smche* is essential to *S. mansoni* development and survival,  
119 highlighting them as targets for novel anti-schistosomal intervention strategies.

120

121

## 122 Results

### 123 *Identification of novel genes encoding ChE proteins in S. mansoni*

124 Three putative ChE paralogs were identified from interrogation of the *S. mansoni* genome:  
125 *smache1* (Smp\_154600), *smbche1* (Smp\_125350) and *smache3* (Smp\_136690). The predicted  
126 *SmChEs* were then aligned with characterized AChE enzymes from *Homo sapiens*, the electric  
127 eel *Torpedo californica*, and the nematode *Caenorhabditis elegans* (Figure 1). Homology  
128 analysis of amino acid sequences revealed that *SmAChE1*, *SmBChE1*, and *SmAChE3* share  
129 (32-35%) sequence identity and (49-52%) sequence similarity. Further, all *SmChEs* have 36-  
130 40% amino acid identity with *H. sapiens* and *T. californica* AChE. All identified *SmChEs* had  
131 ChE-specific characteristics, including a catalytic triad with an active site serine, which is  
132 required for ester hydrolysis [32]. Interestingly, the His residue of the catalytic triad of  
133 *SmBChE1* appears to have been substituted for Gln, a change consistent among all the BChE1  
134 homologs shown for other Platyhelminthes, but not nematode or model organism BChE1  
135 sequences (Figure S1). A 3D model of the three *SmChEs* was constructed by homology  
136 modeling with AChE from model organisms (*H. sapiens* and *T. californica*) (Figure S2). All  
137 three *SmChEs* exhibited predicted folding characteristics of the functional globular enzymes  
138 as most of the  $\alpha$ -helical and  $\beta$ -stranded sheets were tightly aligned. Each predicted *SmChE*  
139 structure consisted of a ChE catalytic domain but, although the core architecture  
140 of the catalytic gorges was well aligned, regions that are associated with substrate specificity  
141 and catalytic efficiency were disparate. In particular, and in agreement with the sequence  
142 alignment, the catalytic triad of *SmBChE1* was predicted to be Ser-Gln-Glu instead of the  
143 canonical Ser-His-Glu present in the other two paralogs. A phylogenetic tree of the alignment  
144 (Figure S3) shows that *SmChEs* were clustered into three distinct branches, with *SmChE1* being  
145 phylogenetically distinct from *SmBChE1* and *SmAChE3*. In addition, each *SmChE* was  
146 grouped together with closely related flatworms, including other *Schistosoma* species.

147 Importantly, as shown in the sequence alignment, *SmChEs* are divergent from the human  
148 homolog. Reflective of the catalytic triad residue difference (Figure S1), trematode BChEs are  
149 phylogenetically divergent from nematode and human BChEs (Figure S4).

150

### 151 ***Developmental expression analysis of SmChE genes***

152 Gene expression patterns of the three *SmChE* paralogs across different developmental stages  
153 were measured using semi-quantitative qPCR (Figures 2A-C) and this data was used to  
154 generate a comparative expression heat map of all three genes (Figure 2D). While all *smche*  
155 developmental expression patterns were variable, the transcript levels of all three genes were  
156 relatively lower in cercariae compared to the other developmental stages. Overall, the transcript  
157 levels of *smache1* and *smache3* genes in most life stages were higher than that of *smbche1*. In  
158 adult worms, *smache1* was expressed at higher levels, specifically in male parasites, followed  
159 by sporocysts.

160

### 161 ***Immunolocalization of SmChEs***

162 To gain insight into the anatomical sites of expression of ChE proteins in *S. mansoni*, *SmChEs*  
163 were immunolocalized in whole juvenile and sectioned adult parasites. In adults, and consistent  
164 with their predicted cholinergic function, all *SmChEs* were expressed throughout the worms'  
165 internal structures (presumably localizing to the neuromusculature) and on the tegument  
166 surface. *SmAChE1* was the least uniformly distributed of all *SmChEs*, localizing mostly to  
167 the tegument (Figure 3A). Additionally, anti-*SmChE* antibodies were able to detect  
168 homologous ChEs in adult *S. haematobium* sections. *SmChE* proteins were detected in all  
169 stages of larval development tested and, as was the case with adult worms, localized to the  
170 tegument (Figure 3B).

171

172 ***Expression and ChE activity of fSmChEs***

173 Soluble, functionally active proteins were expressed in *P. pastoris*, purified via IMAC and  
174 tested for ChE activity. Both fSmAChE1 and fSmAChE3 demonstrated significantly stronger  
175 hydrolase activity when AcSCh was used as a substrate, compared to fSmBChE1 and,  
176 conversely, fSmBChE1 hydrolyzed BcSCh to significantly higher levels compared to  
177 fSmAChE1 and fSmAChE3 (Figure 4A). All paralogs exhibited Michaelis–Menten kinetics  
178 (Table 1) when hydrolyzing their designated substrate, with fSmAChE1 having a substrate  
179 affinity approximately twice that of fSmAChE3. In addition, preferred substrate activity of both  
180 fSmAChE1 and fSmAChE3 was inhibited by DDVP, an AChE inhibitor, whereas iso-OMPA,  
181 a specific inhibitor of BChE, only inhibited *SmBChE1* activity (Figure 4B).

182

183 **Table 1. Kinetic parameters of fSmChEs**

| SmChE paralog | Vmax (nmol/min/mg)      | Km (mM)                    |
|---------------|-------------------------|----------------------------|
| fSmAChE1      | 5.57 ± 0.54*            | 5.83 ± 1.62*               |
| fSmAChE3      | 5.59 ± 1.37*            | 10.87 ± 6.17*              |
| fSmBChE1      | 1.7 ± 0.09 <sup>#</sup> | 34.38 ± 12.71 <sup>#</sup> |

184 \*Hydrolysis of AcSCh.

185 <sup>#</sup>Hydrolysis of BcSCh.

186

187 ***BChE and secreted ChE activity in schistosomes***

188 Although the presence of nonspecific ChE activity has long been known in schistosomes [33],  
189 the identity of the gene product and its function remain unknown. Prompted by the  
190 identification of *SmBChE1* as a BChE, based on its substrate preference and enzymatic  
191 inhibition by iso-OMPA, we sought to investigate the distribution of BChE activity in juvenile  
192 and adult schistosomes. Extracts from *S. mansoni* schistosomula had higher BChE activity  
193 compared to *S. mansoni* adult worms (Figure 5A), and that activity was significantly greater in



194 *S. mansoni* compared with *S. haematobium* adults (Figure 5B). Varied amounts of AChE  
195 activity were detected in ES from all developmental stages tested. ES products from adult males  
196 had double the AChE activity of adult female ES products ( $P < 0.001$ ), while cercariae ES  
197 exhibited the highest activity (at least ten-fold more than male ES products ( $P < 0.0001$ )) and  
198 egg ES had the lowest (Figure 5C). Availability of ES precluded the measurement of secreted  
199 BChE activity from all developmental stages but, of those tested, activity in schistosomula ES  
200 products was the highest - twice as high as that of adult ( $P < 0.01$ ) and cercariae ( $P < 0.01$ ) ES  
201 (Figure 5D). SmChEs were purified from ES products of *S. mansoni* adult worms using  
202 edrophonium–sepharose affinity chromatography. Purification resulted in an activity increase  
203 of more than 200-fold relative to crude ES (Figure 5E). Resolution of the purified proteins by  
204 SDS-PAGE resulted in a doublet with a major band migrating at 70 kDa under denaturing and  
205 reducing conditions (Figure 5F). The identity of purified, secreted SmChEs was substantiated  
206 by in-gel LC-MS/MS analysis with the peptide data generated used to interrogate the *S.*  
207 *mansoni* proteome (predicted from the *S. mansoni* genome -  
208 <http://www.genedb.org/Homepage/Smansoni>). The false discovery rate was set at <1% and  
209 only proteins with at least two unique peptides having significant Mascot identification scores  
210 ( $P < 0.05$ ) were considered. The top protein hits were identified as SmAChE1 (Smp\_154600)  
211 and SmBChE1 (Smp\_125350); SmAChE1 had a relative abundance of more than 40-fold that  
212 of SmBChE1 (supplementary table 3).

213

#### 214 ***RNAi-mediated smche transcript and SmChE protein reduction***

215 Schistosomula electroporated with *smache1* siRNA showed respective decreases in SmAChE1  
216 mRNA levels of 55.4% ( $P \leq 0.05$ ) and 81.3% ( $P \leq 0.001$ ) at one and seven days post-treatment,  
217 respectively, compared to the *luc* control (Figure 6A), while treating parasites with *smbche1*  
218 siRNA caused 32.0% ( $P \leq 0.001$ ) and 84.5% ( $P \leq 0.001$ ) suppression of *smbche1* mRNA

219 expression at day 3 and 7 after electroporation, respectively, compared to the *luc* control  
220 (Figure 6B). Treatment of schistosomula with *smache3* siRNA resulted in respective decreases  
221 in *smache3* mRNA levels of 27.4% ( $P \leq 0.001$ ) and 47.2% ( $P \leq 0.01$ ) three and seven days  
222 after electroporation, compared to the *luc* control (Figure 6C). Schistosomula electroporated  
223 with a cocktail of all three *smche* siRNAs showed decreases of all three transcript levels over  
224 time, with *smache3* mRNA levels decreasing by an average of 90% ( $P \leq 0.001$ ) by day 3 after  
225 treatment, compared to the *luc* control (Figure 6D).

226 Seven days after treatment with *SmAChE1*, *SmBChE1* or *SmAChE3* siRNAs, schistosomula  
227 showed decreases in *SmAChE1*, *SmBChE1* or *SmAChE3* protein expression of 73%, 59% and  
228 46%, respectively, compared to luciferase controls (Figure 6E).

229

### 230 ***Suppression of SmChE activity***

231 Suppression of AChE activity was seen in *smache1* and *smache3* siRNA-treated parasites from  
232 5 and 3 days after electroporation, respectively (Figure 7A), compared to the *luc* control, while  
233 schistosomula treated with *smbche1* siRNA did not show any significant reduction in BChE  
234 activity, even 7 days after electroporation (Figure 7B). Parasites electroporated with a cocktail  
235 of all three *smche* siRNAs showed significant decreases in AChE activity at 3 days (62%  
236 reduction,  $P \leq 0.001$ ), 5 days (67% reduction,  $P \leq 0.001$ ) and 7 days (71% reduction,  $P \leq 0.001$ )  
237 after treatment (Figure 7C). BChE activity was not measured in the cocktail siRNA treatment  
238 group.

239 Individual silencing of *smache1* or *smache3* genes and combined silencing of all three *smche*  
240 genes reduced glucose uptake in schistosomula by 24.9% ( $P \leq 0.001$ ), 32.34% ( $P \leq 0.001$ ) and  
241 38.61% ( $P \leq 0.001$ ) at 48 h post-treatment, respectively, relative to the *luc* control. However,  
242 *smbche1*-silenced parasites showed no significant changes in glucose uptake at the same

243 timepoint and there was no difference in the glucose consumed by the *smache1* or *smache3*  
244 siRNA-treated groups compared with the cocktail siRNA-treated group (Figure 7D).  
245 Transcript levels of the glucose transporters, *sgtp1* and *sgtp4*, were neither decreased nor  
246 significantly increased in individual or cocktail *smche*-silenced parasites (Figure S5).

247

#### 248 ***Effects of smche silencing on schistosomula viability in vitro and development in vivo.***

249 Parasites treated with *smache1*, *smbche1* or *smache3* siRNAs showed significant decreases in  
250 viability at days 3, 5 and 1 after treatment, respectively, compared to *luc* controls. At days 5  
251 and 7 post-treatment, the most significant decrease in parasite viability was seen in the group  
252 which received the cocktail siRNA treatment, compared to *luc* controls. Furthermore, viability  
253 in this group was also significantly lower than it was for any individual treatment at these two  
254 time points (Figure 8A).

255 To examine whether RNAi-mediated *smche* suppression reduced parasite viability *in vivo*,  
256 mice were infected with *smche*-silenced parasites and worm burdens were measured after three  
257 weeks. From two independent experiments, there was an average 88.15%, 55.15%, 75.95%  
258 and 88.35% decrease in adult fluke burdens from mice injected with *smache1*-, *smbche1*-,  
259 *smache3*- and *smche* cocktail-silenced schistosomula, respectively, compared to mice infected  
260 with *luc*-treated parasites (Figures 8B and C). All worm burden decreases were significant  
261 and there was no significant difference in fluke burdens between mice injected with *luc*-  
262 treated parasites and non-electroporated control parasites. All mice had been successfully  
263 infected with parasites, as serum from necropsied mice contained parasite-specific antibodies  
264 (data not shown). Compared to *luc*-treated parasites, worms recovered from *smche*-treated  
265 parasites showed no difference in *smche* transcript levels (data not shown).

266

## 267 ***Bio-scavenging of carboxylic esters by SmBChE1***

268 The hypothesis that *SmBChE* may act as a molecular decoy in schistosomes and detoxify the  
269 effects of organophosphorus AChE inhibitors was examined by testing whether (a) inhibition  
270 of parasite-derived BChE potentiated the effects of DDVP (an organophosphorous AChE  
271 inhibitor) and (b) addition of exogenous BChE (f*SmBChE1*) mitigated the effects of DDVP.  
272 DDVP activity in schistosome extracts significantly increased in the presence of increasing  
273 amounts of the BChE inhibitor, iso-OMPA (Figure 9A) and DDVP-mediated killing of  
274 schistosomula was significantly increased in the presence of iso-OMPA (60.9% compared with  
275 21.8%;  $P < 0.0001$ ) (Figure 9B). Further, *smbche1*-silenced schistosomula were significantly  
276 more susceptible to DDVP-mediated killing than *luc*-treated controls (83.44% compared with  
277 22.95%;  $P < 0.0001$ ) (Figure 9C). Conversely, DDVP-induced inhibition of AChE in extracts  
278 was completely ablated in the presence of f*SmBChE* (Figure 9D) and schistosomula were  
279 increasingly resistant to DDVP-mediated killing with the addition of increasing amounts of  
280 recombinant protein to the culture media (Figure 9E).

281

## 282 **Discussion**

283 Cholinesterase (ChE) activity in *S. mansoni* was first described by Bueding in 1952 [33] and  
284 was well characterized biochemically in the four decades succeeding this discovery. The  
285 technological limitations of this time period meant that most of the evidence for *SmChEs* came  
286 from whole worm studies and analyses of crude parasite extracts (reviewed in [13]), which  
287 could not ascribe ChE activity to any particular protein. Several studies in the early 2000's  
288 characterized a single AChE from *S. mansoni* (Smp\_154600 in the current gene annotation  
289 nomenclature) and its direct homolog in other species of schistosomes [14, 15, 21], but lack of  
290 a comprehensive schistosome genome annotation at the time precluded identification of more  
291 ChE family members. Interrogation of the most recent iteration of the *S. mansoni* genome

292 assembly has identified two additional ChE-encoding genes that are paralogs to Smp\_154600  
293 (which we have termed *SmAChE1*); Smp\_125350 (*SmBChE1*) and Smp\_136690 (*SmAChE3*).  
294 In this current study, we have provided a more in-depth characterization of the previously  
295 documented *SmAChE1* and described two novel ChEs from *S. mansoni*: *SmAChE3* – an AChE  
296 not previously reported; and *SmBChE1* – a BChE which, to the best of our knowledge, has  
297 never been documented in the helminth literature.

298

299 All *SmChEs* share a modest level of identity which is consistent with their divergence over  
300 evolutionary time, an occurrence that is possibly due to a series of gene duplications due to the  
301 phylogenetic distance between the relative clades. This divergence between *SmChEs* and, also,  
302 ChEs of other organisms, provides evidence for the increasing reports of non-cholinergic  
303 functions of ChEs in the literature. Additionally, the relative lack of sequence identity between  
304 *SmChEs* and human ChEs suggests potential scope for the development of intervention  
305 strategies targeting schistosome ChEs that will not affect the host. Despite the diversity  
306 between ChEs, all enzymes analyzed herein would appear to be enzymatically active as they  
307 possessed a catalytic triad with an active site serine, the amino acid responsible for ester  
308 hydrolysis [32]. It is interesting to note, however, the catalytic triad His – Gln substitution in  
309 *SmBChE1* (and the other platyhelminth BChE1 homologs); while this change is not a hallmark  
310 of model BChEs, that it occurs within an entire parasite lineage is noteworthy and will be  
311 investigated further.

312

313 The transcript levels of each *smche* varied among parasite developmental stages and this is  
314 likely a response to the differing cholinergic and cholinesterase-independent requirements of  
315 the parasite throughout its lifecycle. For example *smache1* is expressed at a higher level in  
316 adult males than females, probably due to the more “muscular” roles of attachment and

317 movement orchestrated by the male compared to the female, which remains sedentary once  
318 inside the gynecophoric canal of the male [34]. Expression of *smbche1* was highest in the egg  
319 stage; there is evidence for BChE involvement in chicken embryo neurogenesis and  
320 development, independent of its enzymatic function [35], which suggests that *SmBChE1* could  
321 play a role in parasite embryogenesis. The miracidium and sporocyst stages had the highest  
322 levels of *smache3* expression, in agreement with Parker-Manuel et al [36].

323

324 Immunolocalization of the *SmChEs* revealed expression in the neuromusculature and tegument  
325 to varying degrees, depending on the paralog, and is consistent with early localization  
326 experiments [20], although the antibodies used in those studies were raised against AChEs  
327 purified from parasite extracts and so the localization could not be attributed to a specific family  
328 member. Localization to the neuromusculature relates to the proteins' traditional cholinergic  
329 functions whereas tegumental distribution is suggestive of non-neuronal cholinergic and/or  
330 non-cholinergic roles. Indeed, surface-expressed *SmAChE* has been implicated in mediating  
331 glucose scavenging by the parasite, as this process can be ablated by membrane-impermeable  
332 AChE inhibitors [22, 23]. Tegumental *SmAChE* may also act to hydrolyze exogenous ACh,  
333 neutralizing its immune-mediating function to create an environment more conducive to  
334 parasite establishment [31]. The localization of these proteins to the tegument of schistosomula  
335 should also be noted since early developing schistosomula are considered most vulnerable to  
336 immune attack [37], and so *SmAChE*-targeted immunotherapeutics could be used effectively  
337 to vaccinate against schistosomiasis. Indeed, antibodies against *SmAChEs* have been shown to  
338 interact with the surface of schistosomula, resulting in complement-dependent killing of the  
339 parasite [38].

340

341 Full-length and functional *SmChEs* were expressed in *P. pastoris*. *SmAChE1* had preferred  
342 substrate specificity for AcSCh over BcSCh, albeit at a three-fold lower affinity than previously  
343 reported for *SmAChE1* expressed in *Xenopus laevis* oocytes [15]. *SmAChE3* also had a  
344 substrate preference for AcSCh and an affinity twice that of *SmAChE1*. Extremely low enzyme  
345 activity was observed with *SmBChE1* when AcSCh was used as a substrate, but enzymatic  
346 activity significantly increased with the use of BcSCh as the substrate. Although sequence  
347 alignment of *SmBChE1* with the other two *SmChEs* revealed a single amino acid substitution  
348 in the peripheral anionic site (Glu – Trp), acyl binding pocket (Val – Leu) and catalytic triad  
349 (His – Gln), it was unclear whether these changes alone were enough to classify *SmBChE1* as  
350 a BChE; based on the significant difference in substrate preference, however, this classification  
351 would appear valid. Cloning of a recombinant BChE from *S. mansoni* is consistent with our  
352 observations of BChE activity in parasite extracts, and *S. mansoni* schistosomula exhibited  
353 significantly more activity than adults, as did *S. mansoni* compared to *S. haematobium* adults.  
354 It has been reported that *S. mansoni* is more sensitive to the BChE inhibitor, iso-OMPA, than  
355 *S. haematobium* [39] and it may be due to the increased BChE activity in *S. mansoni*. Indeed,  
356 this relationship has been documented between AChE and metrifonate (precursor of DDVP  
357 used in this study); *S. haematobium* is more sensitive to the inhibitor than *S. mansoni* because  
358 of the greater amount of AChE on the worm's surface [39].

359

360 For the first time, we document the presence of secreted *SmChE* activity in schistosomes and  
361 AChE activity was highest in cercarial ES products. Of the intra-mammalian stages tested,  
362 AChE activity was highest in schistosomula and adults and may be acting to bind and neutralize  
363 exogenous AChE inhibitors [40] (thus protecting tegumental and somatic AChE) or host-  
364 derived ACh to mitigate the immunomodulatory effects of this molecule. Extending this  
365 hypothesis, ES products from cultured female worms had lower AChE activity than males and



366 could be due to females worms having less of a requirement for this defensive mechanism as  
367 they reside in the relative shelter of the gynecophoric canal. BChE activity was present in the  
368 ES products of adults, schistosomula and cercariae and was significantly higher in the intra-  
369 mammalian larval stage than the other two stages. The *SmChE* molecules present in ES were  
370 isolated by purification on edrophonium (a reversible ChE inhibitor) sepharose and, consistent  
371 with the class of activity observed in ES, identified by mass spectrometry as *SmAChE1* and  
372 *SmBChE1*; the former being forty-fold more abundant than the latter.

373

374 RNAi-mediated silencing of *smache1* and *smache3* in schistosomula showed decreases in  
375 AChE activity, consistent with reductions in transcript and protein expression levels.  
376 Moreover, inhibition of this biochemical activity was greater in schistosomula treated with the  
377 *smche* siRNA cocktail than parasites receiving any of the individual treatments, further  
378 evidence suggestive of simultaneous silencing of all *smache* paralogs. AChE activity inhibition  
379 in *smache3*-silenced parasites was more pronounced than in *smache1*-silenced parasites, which  
380 was inconsistent with protein level reductions and this may be due to the increased AChE  
381 activity reported for *SmAChE1* ( $V_{max} = 5.57$  nmol/min/mg,  $K_m = 5.83$  mM) compared to  
382 *SmAChE3* ( $V_{max} = 5.59$  nmol/min/mg,  $K_m = 10.87$  mM). It is also possible that there may  
383 not be a direct correlation between AChE activity and protein expression, given that additional,  
384 non-cholinergic functions have been ascribed to ChEs [5, 22, 41]. This may also be the reason  
385 why no significant decrease in BChE activity was observed in *smbche1*-silenced parasites,  
386 despite significant reductions in transcript and protein expression levels.

387

388 Previous studies have documented the involvement of *SmChEs* in the uptake of exogenous  
389 glucose by schistosomes through the ablation of the glucose uptake pathway by  
390 organophosphorus [39] and large molecule [23] AChE inhibitors, so we sought to identify the



391 *SmChE* paralog(s) responsible for this mediation through the use of RNAi targeting *smche*  
392 genes. Individual gene knockdown of *smache1* and *smache3* suppressed glucose uptake in  
393 schistosomula, implying that both genes were involved in regulation of this mechanism.  
394 Tegumental AChE is speculated to mediate glucose uptake by limiting the interaction of ACh  
395 with tegumental nicotinic ACh receptors which is thought to decrease the amount of glucose  
396 uptake through surface glucose transporters. The fact that both molecules are localized to the  
397 tegument and can hydrolyze ACh therefore provides evidence for their role in this pathway.  
398 Silencing of *smache1* in schistosomula did not show any difference in glucose uptake and is  
399 probably reflective of the molecule's limited role in ACh hydrolysis. Transcript levels of *sgtp1*  
400 and *sgtp4* were not significantly changed in *smache1*- and *smache3*-silenced parasites,  
401 suggesting that *SmAChEs* may facilitate glucose uptake in a manner which does not directly  
402 involve glucose transporters. Indeed, at least in nematodes, AChEs have been proposed to be  
403 involved in altering the permeability of surrounding host cells, allowing nutrients (such as  
404 glucose) to leak into the parasite niche and be uptaken [42].

405

406 Individual *smche* silencing in schistosomula resulted in significant decreases in parasite  
407 viability at various timepoints after treatment, with *smache3*-silenced parasites showing the  
408 most rapid and significant decrease in viability after treatment. Of the *smche* paralogs studied,  
409 *smache3* is the only one whose expression is significantly upregulated between *S. mansoni*  
410 cercariae and schistosomula [36], an observation consistent with qPCR data, and so silencing  
411 this relatively highly expressed gene may have the most profound effects of all *smche* silencing  
412 on parasite viability. The viability of parasites treated with all three *smche* siRNAs was  
413 significantly decreased compared to parasites treated with an individual siRNA, suggesting  
414 functional overlap exists between the paralogs. This redundancy has been documented in  
415 AChE-knockout mice where BChE has the ability to hydrolyze ACh in the absence of AChE

416 [43, 44]. Moreover, AChE deletion is found to be lethal in *Drosophila* only because there is no  
417 alternative BChE paralog to compensate for the lack of ACh hydrolysis [45, 46]. Similar to the  
418 observations in this study, simultaneous knockdown of multiple ChE genes has been reported  
419 to have deleterious effects on their target organisms including the insects *Plutella xylostella*  
420 [47], *Chilo suppressalis* [48] and *Tribolium castaneum* [49] and the nematodes  
421 *Nippostrongylus brasiliensis* [50] and *Caenorhabditis elegans* [51]. Similarly, chemotherapy  
422 with “broad spectrum” ChE inhibitors has shown to be effective against a range of organisms,  
423 including pest insects [52], schistosomes [23, 53-55] and parasitic nematodes [56]. It is likely  
424 that the simultaneous silencing of the *smche* genes in this study has a profound effect on  
425 parasite viability due to the knockdown of cholinergic signaling, a process to which all paralogs  
426 contribute, as they have all been shown to hydrolyze ChE substrates. Also possible is that  
427 knockdown of these three genes might have resulted in the ablation of multiple other functions  
428 that have been suggested for these molecules [5, 49, 57]. Reflective of *in vitro* silencing  
429 experiments, worm recovery from mice infected with all groups of *smche*-silenced parasites  
430 was significantly less than controls, indicating that suppression of *smache1*, *smbche1* or  
431 *smache3* could inhibit schistosome establishment and/or development in the host. An  
432 immunomodulatory function that results in a host environment favorable to parasite survival  
433 has been suggested for AChE secreted by *N. brasiliensis* [31] and so it may be that, if  
434 schistosome ChEs have similar non-neuronal roles, impairment of ChE function in these  
435 parasites may lead to more efficient immune-mediated worm expulsion. There is now a  
436 growing body of evidence that AChEs play non-classical roles as adhesion molecules [4, 58,  
437 59] due to these two protein families sharing significant domain homology and so *SmChE*-  
438 silenced worms may be unable to properly establish in their site of predilection due to impaired  
439 adherence to host vasculature. Indeed, *in vivo* treatment with AChE-inhibitory tris (p-  
440 aminophenyl) carbonium salts [60] results in a shift of the worms from the mesenteries to the

441 liver, which may be a consequence of improper parasite attachment. Schistosomula silenced  
442 for all three *smche* genes exhibited the highest mortality *in vivo* when worm recovery was  
443 averaged across the two independent trials, suggesting that, not only is simultaneous  
444 knockdown of *SmChEs* required to overcome any functional redundancy between the  
445 molecules, but that this treatment has the largest impact on parasite pathogenesis due to the  
446 inhibition of multiple biological functions collectively orchestrated by these proteins.

447

448 The *smche* transcript levels of silenced worms recovered from mice were no different from  
449 control parasites and it is likely that the surviving worms received less siRNA than those worms  
450 that died in the host. Alternatively, surviving worms might have recovered from the transient  
451 effects of RNAi, highlighting the advantage of targeted gene knockout techniques such as  
452 CRISPR/Cas9 which has recently been reported for the first time in schistosomes [61].

453

454 It is generally accepted that vertebrate BChE has a predominant role in the detoxification of  
455 ingested or inhaled drugs and poisons such as the AChE-inhibitory organophosphorous esters  
456 that constitute nerve agents and pesticides due to the binding of the enzyme to these molecules  
457 (reviewed in [3]). Inactivation of *SmBChE1* in parasite extracts and live schistosomula by the  
458 BChE inhibitor iso-OMPA or through RNAi-mediated silencing potentiated the effects of  
459 DDVP whereas addition of exogenous *SmBChE1* mitigated the effects, suggesting a similar  
460 detoxification role exists for schistosome BChE as for the vertebrate enzyme. Numerous plant  
461 species in the *Solanaceae* used for their nutritional value (potatoes, for example) and others  
462 employed in traditional medicine for their anthelmintic properties contain naturally-occurring  
463 AChE-inhibitory compounds [62, 63], and so it may be that the evolution of this dietary  
464 behavior in schistosomiasis endemic populations has resulted in selective pressure on the

465 parasite to produce these particular ChE molecules. The localization of *SmBChE1* to the  
466 tegument and its presence in ES products may further support this hypothesis, as the enzyme  
467 would be spatially available to interact with toxins present in the host environment, thus  
468 safeguarding parasite AChE against AChE inhibitors. Moreover, BChE activity is higher in *S.*  
469 *mansoni* than *S. haematobium*, which is more sensitive to the effects of the organophosphorous  
470 AChE inhibitor metrifonate. It has been reported that this sensitivity is due to the larger amount  
471 of tegumental AChE present in *S. haematobium* [39], but it may also be due to the reduced  
472 amount of BChE available to detoxify the inhibitor, as a similar relationship has been reported  
473 in studies which use human BChE to counter organophosphate toxicity [64]. Plasma-derived  
474 human BChE is currently in a phase I clinical trial as a nerve agent detoxifier, and a  
475 recombinant human BChE mutant is being used to prevent relapse in cocaine addicts due to  
476 the enzyme's ability to hydrolyze the drug into inactive by-products [3]. One of the major  
477 limitations of these approaches, however, is the catalytic turnover of human BChE [3] and so  
478 there is emphasis on the identification of BChE homologues from other organisms, such as  
479 *SmBChE1*, that might offer improved detoxification activity in this regard.

480

481 Inhibition of BChE in the absence of DDVP results in parasite death so a bio-scavenging role  
482 is possibly not the only function of this enzyme. Indeed, vertebrate BChE has also been shown  
483 to have roles in (1) ACh hydrolysis in situations of AChE deficiency [65], (2) fat metabolism  
484 by hydrolyzing the feeding stimulant peptide octanoyl ghrelin [66], and (3) scavenging  
485 polyproline-rich peptides to regulate protein-protein and protein-DNA interactions [67].

486

487 In summary, the work herein has identified multiple ChE paralogs in the genome of *S. mansoni*  
488 where previous studies, making use of the technology available at the time, attributed ChE  
489 activity to a single AChE. Consistent with previous observations that ChEs are multi-faceted

490 enzymes, we posit that the three ChE paralogs described herein may fulfil distinct neuronal and  
491 non-neuronal functions based on their anatomical and temporal expression in the parasite and  
492 its ES products and the enzymatic activity of recombinant molecules. In addition to providing  
493 valuable insight into the functionality of individual ChE molecules, the study herein documents  
494 the essentiality of these proteins, providing a compelling evidence base for their use as  
495 intervention targets against schistosomiasis.

496

## 497 **Materials and Methods**

### 498 *Ethics statement*

499 All experimental procedures reported in the study were approved by the James Cook University  
500 (JCU) animal ethics committee (ethics approval numbers A2271 and A2391). Mice were  
501 maintained in cages in the university's quarantine facility (Q2152) for the duration of the  
502 experiments. The study protocols were in accordance with the 2007 Australian Code of Practice  
503 for the Care and Use of Animals for Scientific Purposes and the 2001 Queensland Animal Care  
504 and Protection Act.

505

### 506 *Parasite maintenance, culture and ES collection*

507 *Biomphalaria glabrata* snails infected with *S. mansoni* (NMRI strain) were obtained from the  
508 Biomedical Research Institute (BRI), MD, USA. Cercariae were shed from infected snails  
509 through exposure to light at 28°C for 1.5 h and were mechanically transformed into  
510 schistosomula [68]. To obtain adult worms, 6-8 week old male BALB/c mice (Animal  
511 Resource Centre, WA, Australia) were infected with 180 cercariae via tail penetration and  
512 adults were harvested by vascular perfusion at 7-8 weeks post-infection [69]. Both adult worms  
513 and schistosomula were cultured (10 adult pairs/ml and 2000 schistosomula/ml) at 37°C and 5%  
514 CO<sub>2</sub> in serum-free modified Basch medium [70] supplemented with 4 × antibiotic/antimycotic

515 (AA - 200 units/ml penicillin, 200 µg/ml streptomycin and 0.5 µg/ml amphotericin B) (SFB) in  
516 6 well plates. Media containing ES products was initially collected after 3 h for schistosomula  
517 or 24 h for adults, and replenished daily thereafter. ES products were stored at -80°C. Media  
518 was thawed when needed, concentrated through Amicon centrifugation filters (Sigma) with a 3  
519 kDa molecular weight cutoff (MWCO), buffer exchanged into phosphate buffered saline, pH  
520 7.4 (PBS) and aliquoted. Protein concentration of ES products was determined using the Pierce  
521 BCA™ Protein Assay kit (ThermoFisher). To collect cercarial ES products, freshly-shed  
522 cercariae were incubated in H<sub>2</sub>O (4000/ml) at 25°C for 3 h. H<sub>2</sub>O was filtered through Whatman  
523 filter paper (11 µm) to remove cercariae and associated debris, and ES products were  
524 concentrated, quantified and stored as described for adult and schistosomula ES products.

525

#### 526 *Parasite extract preparation*

527 To make PBS-soluble extracts, worms were homogenized in PBS (50 µl/adult worm pair or 50  
528 µl/1000 schistosomula) at 4°C using a TissueLyser II (Qiagen), homogenates were incubated  
529 overnight with mixing at 4°C and the supernatants collected by centrifugation at 15,000 g for  
530 1 h at 4°C. Triton X-100-soluble extracts were made from the PBS-insoluble pellets by  
531 resuspension in 1% Triton X-100, 40 mM Tris-HCl, pH 7.4, mixing overnight at 4°C and the  
532 supernatant collected by centrifugation at 15,000 g for 1 h at 4°C. Tegument extraction was  
533 achieved using a combination of freeze/thaw/vortex [71]. In brief, parasites were slowly  
534 thawed on ice, washed in TBS (10 mM Tris/HCl, 0.84% NaCl, pH 7.4) and incubated for 5 min  
535 on ice in 10 mM Tris/HCl, pH 7.4 followed by vortexing (5 × 1 s bursts). Subsequently, the  
536 tegumental extract was pelleted at 1000 g for 30 min and solubilized (3×) in 200 µl of 0.1%  
537 (w/v) SDS, 1% (v/v) Triton X-100 in 40 mM Tris, pH 7.4 with pelleting at 15,000 g between  
538 each wash. Protein concentration was determined using the Pierce BCA Protein Assay kit,  
539 aliquoted and stored at -80°C until use.

540 **Bioinformatics**

541 Based on Pfam analysis (search = cholinesterase) of the *S. mansoni* genome  
542 (<http://www.geneDB.org/Homepage/Smansoni>), three *smche* paralogs (*smache1* -  
543 Smp\_154600, *smbche1* - Smp\_125350 and *smache3* - Smp\_136690) were identified.  
544 Homologous ChE sequences from other species were identified using BLASTP.  
545 (<http://blast.ncbi.nlm.nih.gov/Blast.cgi>) and the resulting sequences were used to generate a  
546 multiple sequence alignment using Clustal Omega  
547 (<https://www.ebi.ac.uk/Tools/msa/clustalo/>). MEGA 7 was used to generate a neighbor-joining  
548 tree with the Poisson correction distance method and a bootstrap test of 1,000 replicates [72].  
549 The tree was visualized with The Interactive Tree of Life (iTOL) online phylogeny tool  
550 (<https://itol.embl.de/>). Structure-homology 3D models of *SmChEs* were generated using the I-  
551 TASSER server (<http://zhanglab.ccmb.med.umich.edu/I-TASSER/>). For structure  
552 visualization and catalytic triad analyses, the Accelrys Discovery Studio (Accelrys Inc.) and  
553 UCSF Chimera MatchMaker ver. 1.4 (University of California) software packages were  
554 utilized.

555

556 **Real-time qPCR**

557 Real-time qPCR was used to assess developmental expression of *smche* genes and to determine  
558 *smche* transcript suppression resulting from RNAi experiments. RNA from miracidia,  
559 sporocysts, cercariae, adult male worms, adult female worms, and eggs were obtained from  
560 BRI. Schistosomula were cultured as described above, harvested (1,000 parasites) after either 3  
561 h, 24 h, 3 or 5 days, washed three times in PBS and stored at -80°C until use. Schistosomula  
562 from RNAi experiments were similarly processed. Total RNA extraction was performed using  
563 the Trizol (Thermofisher) reagent according to manufacturer's instructions. After air-drying,  
564 RNA pellets were re-suspended in 12 µl diethylpyrocarbonate (DEPC)-treated



565 water. Concentration and purity of RNA was determined using an ND2000 Nanodrop  
566 spectrophotometer (Thermofisher). Synthesis of cDNA was carried out with 1 µg of total RNA  
567 using Superscript-III-Reverse Transcriptase (Invitrogen) according to the manufacturer's  
568 instructions. Finally, cDNA was quantified, diluted to 50 ng/µl, aliquoted and stored at -20°C.  
569 Real-time qPCR primers for each *smche* (supplementary Table 1) were designed using  
570 Primer3 (<http://frodo.wi.mit.edu/>). The housekeeping gene *smcox1* was selected as an internal  
571 control to normalize relative *smche* gene expression [73]. Each qPCR (1 µl (50 ng) of cDNA,  
572 5 µl of 2x SYBR green master mix (Bioline), 1µl (5 pmol/µl) each of forward and reverse  
573 primers and 2 µl of nuclease-free water) was run in a Rotor-Gene Q thermal cycler (Qiagen)  
574 using 40 cycles of 95°C for 10 seconds, 50-55°C for 15 seconds and 72°C for 20 seconds.  
575 Stage-specific *smche* gene expression levels were normalized against *smcox1* gene expression  
576 using the comparative  $2^{-\Delta\Delta CT}$  method [74]. All results represent the average of 5 independent  
577 experiments with data presented as mean ± SEM.

578

### 579 ***Cloning, expression and purification of smche gene fragments in E. coli***

580 Complete ORFs for *smache1*, *smbche1* and *smache3* were synthesized by Genewiz. Attempts  
581 to express full-length sequences in *E. coli* were unsuccessful, so primer sets incorporating *NdeI*  
582 (forward primer) and *XhoI* restriction enzyme sites (reverse primer) were designed  
583 (supplementary Table 1) to amplify partial, non-conserved regions of each *smche*, which might  
584 prove more amenable to expression. Sequences (containing *NdeI*/*XhoI* sites) for each pSmChE  
585 were amplified from each full-length template by PCR and cloned into the pET41a expression  
586 vector (Novagen) such that the N-terminal GST tag was removed. Protein expression was  
587 induced for 24 h in *E. coli* BL21(DE3) by addition of 1 mM Isopropyl beta-D-1-  
588 thiogalactopyranoside (IPTG) using standard methods. Cultures were harvested by  
589 centrifugation (8,000 g for 20 min at 4°C), re-suspended in 50 ml lysis buffer (50 mM sodium



590 phosphate, pH 8.0, 300 mM NaCl, 40 mM imidazole) and stored at -80°C. Cell pellets were  
591 lysed by three freeze-thaw cycles at -80°C and 42°C followed by sonication on ice (10 × 5 s  
592 pulses [70% amplitude] with 30 s rest periods between each pulse) with a Qsonica Sonicator.  
593 Triton X-100 was added to each lysate at a final concentration of 3% and incubated for 1 h at  
594 4°C with end-over-end mixing. Insoluble material (containing rSmChEs) was pelleted by  
595 centrifugation at 20,000 g for 20 min at 4°C. The supernatant was discarded, and inclusion  
596 bodies (IBs) were washed twice by resuspension in 30 ml of lysis buffer followed by  
597 centrifugation at 20,000 g for 20 min at 4°C. IBs were then solubilized sequentially by  
598 resuspension in 25 ml lysis buffers containing either 2 M, 4 M or 8 M urea, end-over-end  
599 mixing overnight at 4°C and centrifugation at 20,000 g for 20 min at 4°C. Finally, supernatant  
600 containing solubilized IBs was diluted 1:4 in lysis buffer containing 8M urea and filtered  
601 through a 0.22 µm membrane (Millipore). Solubilized IBs were purified by immobilized metal  
602 affinity chromatography (IMAC) by loading onto a prepacked 1 ml His-Trap HP column (GE  
603 Healthcare) equilibrated with lysis buffer containing 8M urea at a flow rate of 1 ml/min using  
604 an AKTA-pure-25 FPLC (GE Healthcare). After washing with 20 ml lysis buffer containing  
605 8M urea, bound His-tagged proteins were eluted using the same buffer with a stepwise gradient  
606 of 50-250 mM imidazole (50 mM steps). Fractions containing rSmChEs (as determined by  
607 SDS-PAGE) were pooled and concentrated using Amicon Ultra-15 centrifugal devices with a  
608 3 kDa MWCO and quantified using the Pierce BCA Protein Assay kit. The final concentration  
609 of each rSmChE was adjusted to 1 mg/ml and proteins were aliquoted and stored at -80°C.

610

### 611 ***Generation of anti-rSmChE antisera and purification of IgG***

612 Three groups of five male BALB/c mice (6-week-old) were intraperitoneally immunized with  
613 either rSmAChE1, rSmBChE1 or rSmAChE3 subunits (50 µg/mouse). Antigens were mixed  
614 with an equal volume of Imject alum adjuvant (Thermofisher) and administered three times,

615 two weeks apart. Two weeks after the final immunization, mice were sacrificed and blood was  
616 collected via cardiac puncture. Blood from all mice in each group was pooled and serum was  
617 separated by centrifugation after clotting and stored at  $-20^{\circ}\text{C}$ . Polyclonal antibodies were  
618 purified from mouse sera using Protein A Sepharose-4B (ThermoFisher) according to the  
619 manufacturer's instructions. Serum from naïve mice was similarly processed.

620

### 621 ***Immunolocalization using anti-rSmChE antisera***

622 ***Adult worm sections:*** Freshly perfused adult *S. mansoni* and *S. haematobium* worms were fixed  
623 in 4% paraformaldehyde, embedded in paraffin and sections (7  $\mu\text{m}$  thick) were cut in a cryostat.  
624 Following deparaffinization in xylene and rehydration in an ethanol series, antigen retrieval  
625 was performed by boiling the slides in 10 mM sodium citrate, pH 6.0, for 40 min followed by  
626 a solution of 10 mM Tris, 1 mM EDTA, 0.05% Tween, pH 9.0, for 20 min. All sections were  
627 then blocked with 10% heat-inactivated goat serum for 1 h RT. After washing 3 times with  
628 PBST, sections were incubated with anti-*SmAChE1*, anti-*SmBChE1*, anti-*SmAChE3*, naïve  
629 sera (negative control), *S. mansoni* or *S. haematobium* infected mouse sera (positive controls)  
630 (1:50 in PBST) overnight at  $4^{\circ}\text{C}$  and then washed again (3  $\times$  5 min each).  
631 Finally, the sections were incubated with goat-anti-mouse IgG-alexafluor647 (Sigma) (1:200  
632 in PBST) for 1 h in the dark at RT. After a final washing step, slides were mounted with  
633 coverslips in Entellan mounting medium (Millipore). Fluorescence and bright-field microscopy  
634 were performed with an AxioImager M1 fluorescence microscope (Zeiss) using 10 $\times$  and 20 $\times$   
635 objectives.

636 ***Live schistosomula:*** *In vitro* cultured living cercariae and schistosomula (3 h, 24 h, 3 and 5  
637 days old) were harvested, washed with PBS and then blocked with PBST/10% heat-inactivated  
638 goat serum for 30 min at RT. Following three washes, the larvae were incubated with anti-  
639 *SmAChE1*, anti-*SmBChE1*, anti-*SmAChE3* or naïve serum (negative control) (1:100 in PBST)

640 overnight at 4°C. Parasites were washed again before incubation with goat-anti-mouse IgG-  
641 alexafluor647 (Sigma) (1: 200 in PBST) for 1 h in the dark at RT, followed by 3 washes.  
642 Finally, schistosomes were fixed in 4% paraformaldehyde and transferred to a microscope slide  
643 for fluorescence microscopy using an AxioImager M1 fluorescence microscope.

644

#### 645 ***Cloning and expression of full-length SmChEs in P. pastoris***

646 Full-length sequences (minus the signal peptide) of *SmAChE1*, *SmBChE1* and *SmAChE3*  
647 (f*SmChEs*) were *EcoRI/XbaI* cloned into the C-terminal 6-His-tagged pPICZαA expression  
648 vector (Invitrogen) to facilitate secretory expression. Recombinant plasmids (20 µg) were  
649 linearized with *PmeI* (f*SmAChE1* & f*SmBChE1*) and *SacI* (f*SmAChE3*), purified by ethanol  
650 precipitation and resuspended in 15 µl of H<sub>2</sub>O. Linearized vectors were electroporated  
651 according to the manufacturer's instructions into *P. pastoris* X-33 cells (ThermoFisher) in 2  
652 mm cuvettes (2 ms, 2000V, 25 µF, 200 Ω, square wave pulse), using a Gene Pulser Xcell (Bio-  
653 Rad), plated onto YPDS agar plates containing 100 µg/ml zeocin and incubated for 3 days at  
654 30°C. Resultant colonies were then picked and patched onto YPDS agar containing 2 mg/ml  
655 zeocin and plates incubated at 30°C until colonies were visible. A high-expressing clone of  
656 each r*SmChE* (determined from pilot expression experiments) was used to inoculate 5 ml  
657 BMGY media supplemented with 50 µg/ml zeocin and grown overnight at 30°C with rotation  
658 at 250 rpm. The entire culture was then used to inoculate 250 ml of BMGY in a 2L baffled  
659 flask and incubation was continued for 24 h at 30°C. Cells were pelleted at 5000 g for 20 min  
660 at RT, re-suspended in 1L of BMMY (to induce protein expression) and split between 2 ×  
661 2L baffled flasks, which were incubated with shaking (250 rpm) at 30°C for 72 h. Methanol  
662 was added to a final concentration of 0.5% (2.5 ml/flask) every 24 h to maintain induction of  
663 protein expression. Culture medium containing the secreted f*SmChE* proteins was harvested  
664 by centrifugation (5000 g for 20 min at RT) and filtered through a 0.22 µm membrane filter

665 (Millipore). Recombinant proteins were purified by IMAC using an AKTA-pure-25 FPLC (GE  
666 Healthcare). Briefly, culture medium was loaded onto a 5 ml His-excel column, pre-  
667 equilibrated with binding buffer (50 mM PBS pH 7.4, 300 mM NaCl), washed with 20 column  
668 volumes of binding buffer and then eluted with binding buffer containing a linear imidazole  
669 gradient (20 to 500 mM). The purity of fractions within the main peak was analyzed by SDS-  
670 PAGE and fractions of appropriate purity were pooled, concentrated and buffer exchanged into  
671 PBS using Amicon Ultra-15 centrifugal devices with a 3 kDa MWCO and quantified using the  
672 Pierce BCA Protein Assay kit. The final concentration of each fSmChE was adjusted to 1  
673 mg/ml and proteins were aliquoted and stored at -80°C.

674

#### 675 *SmChE enzyme assays*

676 Activity of fSmChEs, extracts and ES samples was determined by the Ellman method [75];  
677 modified for use with 96 well microplates. Samples (parasite extracts, ES and fSmChEs) were  
678 diluted in assay buffer (0.1M sodium phosphate, pH 7.4), and 2 mM acetylthiocholine (AcSCh)  
679 or butyrylthiocholine (BcSCh) (Sigma) and 0.5 mM 5, 5'-dithio-bis (2-nitrobenzoic acid)  
680 (DTNB) (Sigma) was added. The absorbance increase was monitored every 5 min at 405 nm  
681 in a Polarstar Omega microplate reader (BMG Labtech). Specific activity was calculated using  
682 the initial velocity of the reaction and extinction coefficient of  $13,260 \text{ M}^{-1} \text{ cm}^{-1}$  for TNB. To  
683 investigate sensitivity of parasite ES products to AChE inhibitors, 25  $\mu\text{g}$  of adult ES was pre-  
684 treated with 1  $\mu\text{M}$  DDVP - active metabolite of the organophosphorous AChE inhibitor  
685 metrifonate - for 20 min at RT before measuring activity. Kinetic parameters of fSmChEs were  
686 characterized by measuring enzyme activity at differing substrate concentrations and plotting  
687 enzyme activity [V] vs. substrate concentration [S]. The  $K_m$  ([S] at  $1/2 V_{max}$ ) was calculated  
688 using the Michaelis Menton equation. Enzyme assays with inhibitors were performed as above  
689 except that fSmChEs in assay buffer were pre-treated with 1  $\mu\text{M}$  DDVP, in the case of

690 f*Sm*AChE1 and f*Sm*AChE3, or 1 mM iso-OMPA – a membrane-impermeable specific BChE  
691 inhibitor - in the case of f*Sm*BChE1, for another 20 min at RT. Experiments were performed  
692 in triplicate with data presented as the mean  $\pm$  SEM.

693

#### 694 ***Purification of secreted SmChEs from adult S. mansoni ES products***

695 Affinity chromatography using edrophonium chloride-sepharose was used to purify *Sm*AChE  
696 from *S. mansoni* based on the method of Hodgson and Chubb [76]. Briefly, 1 g of epoxy-  
697 activated sepharose 6B beads was washed with distilled H<sub>2</sub>O, the slurry centrifuged at 814 g  
698 for 5 min and the pellet gently resuspended in 50 mM sodium phosphate, pH 8.0, containing  
699 200 mM edrophonium chloride (1:2 ratio of sepharose:edrophonium chloride). The pH of the  
700 solution was adjusted to 10.0 and coupling of edrophonium with the sepharose was facilitated  
701 by incubating the mixture overnight with shaking at 50°C. The gel was then washed  
702 sequentially with 10 volumes each of 100 mM sodium acetate, pH 4.5, 12 mM sodium borate,  
703 pH 10.0, and distilled H<sub>2</sub>O and finally resuspended in distilled H<sub>2</sub>O to generate a 1 ml gel  
704 slurry. The gel slurry was packed into a chromatography column (10 cm long, 1 cm diameter)  
705 and equilibrated by gravity flow at 4°C with 10 column volumes (CV) of equilibration buffer  
706 (50 mM phosphate buffer, pH 8.0). Approximately 20 ml of ES from adult *S. mansoni*  
707 (concentrated through a 10 kDa MWCO centrifugal filter from a starting volume of 500 ml of  
708 media, harvested each day for 7 days from 100 pairs of adult worms and buffer exchanged into  
709 equilibration buffer) was added to the column followed by washes with 20 CV of equilibration  
710 buffer and 20 CV of equilibration buffer containing 500 mM NaCl. Bound *Sm*ChE was then  
711 eluted with 10 CV of equilibration buffer containing 500 mM NaCl and 20 mM edrophonium  
712 chloride. The eluate was concentrated and buffer exchanged into PBS using a 10 kDa MWCO  
713 centrifugal filter (edrophonium chloride is an AChE inhibitor and would interfere with

714 subsequent activity assays) and resolved by 10% SDS-PAGE to check purity and facilitate  
715 identification by mass spectrometry.

716

717 ***Mass spectrometric analysis of purified, secreted SmChE***

718 Bands of interest were manually excised from the SDS polyacrylamide gel, washed with 50%  
719 acetonitrile and dried under vacuum at 30°C. Cysteine residues were reduced with 20 mM  
720 DTT for 1 h at 65°C followed by alkylation with 50 mM iodoacetamide for 40 min at 37°C in  
721 the dark. In-gel trypsin digestion was performed at 37°C overnight with 0.8 ng of trypsin in  
722 trypsin reaction buffer (40 mM ammonium bicarbonate, 9% acetonitrile). The supernatant  
723 was removed to a fresh microfuge tube and stored at 4°C, and the remaining peptides were  
724 further extracted from the gel pieces by incubation with 0.1% trifluoroacetic acid (TFA) at  
725 37°C for 45 min. The newly extracted supernatant was combined with the previously collected  
726 supernatant, then dried under vacuum. Prior to the matrix-assisted laser desorption/ionization-  
727 time-of-flight mass spectrometry (MALDI-TOF MS) analysis, peptides were concentrated and  
728 desalted using ZipTips (Millipore) following the manufacturer's instructions. Tryptic peptides  
729 were re-dissolved in 10 µl 5% formic acid and 6 µl was injected onto a 50 mm 300 µm C18  
730 trap column (Agilent Technologies) followed by an initial wash step with Buffer A (5% (v/v)  
731 ACN, 0.1% (v/v) formic acid) for 5 min at 30 µl/min. Peptides were eluted at a flow rate of 0.3  
732 µl/min onto an analytical nano HPLC column (15 cm × 75 µm 300SBC18, 3.5 µm, Agilent  
733 Technologies). The eluted peptides were then separated by a 55-min gradient of buffer B (90/10  
734 acetonitrile/ 0.1% formic acid) 1-40% followed by a 5 min steeper gradient from 40-80%. The  
735 mass spectrometer (ABSciex 5600 Triple ToF) was operated in data-dependent acquisition  
736 mode, in which full scan TOF-MS data was acquired over the range of 350-1400 m/z, and over  
737 the range of 80-1400 m/z for product-ion observed in the TOF-MS scan exceeding a threshold

738 of 100 counts and a charge state of +2 to +5. Analyst 1.6.1 (ABSCIEX) software was used for  
739 data acquisition and analysis.

740 For protein identification, a database was built using the *S. mansoni* genome  
741 v5.0 [<http://www.genedb.org/Homepage/Smansoni>] with the common repository of  
742 adventitious proteins (cRAP, <http://www.thegpm.org/crap/>) appended to it. Mascot v.2.5.1  
743 (Matrix Science) was used for database search. Carbamidomethylation of Cys was set as a fixed  
744 modification and oxidation of Met and deamidation of Asn and Gln were set as variable  
745 modifications. MS and MS/MS tolerance were set at 10 ppm and 0.1 Da, respectively and  
746 only proteins with at least two unique peptides (each composed of at least seven amino acid  
747 residues) identified were considered reliably identified and used for analysis.

748

#### 749 ***siRNA design and synthesis***

750 Three short interfering RNA duplexes (siRNAs) targeting each of the three identified *smche*  
751 paralogs were designed (supplementary Table 2) and checked to avoid off-target silencing  
752 by BLAST search using the *S. mansoni* genome. An irrelevant siRNA from firefly luciferase  
753 (*luc*) was selected as a negative control [77]. All siRNAs were commercially synthesized  
754 (Integrated DNA Technologies) and oligonucleotides were suspended to a concentration of 1  
755  $\mu\text{g}/\mu\text{l}$  in DEPC-treated water.

756

#### 757 ***Electroporation of schistosomula with siRNA***

758 Prior to electroporation, mechanically transformed schistosomula were cultured for 24 h (2,000  
759 schistosomula/ml), at 37°C and 5% CO<sub>2</sub> in SFB in 6 well plates. After 3 washes with PBS,  
760 schistosomula were re-suspended in modified Basch medium (3,000 schistosomula/100  $\mu\text{l}$ ) and  
761 3,000 schistosomula were transferred into a Genepulser 4 mm electroporation cuvette (Bio-  
762 Rad) for every siRNA treatment (four) and timepoint (four for each siRNA treatment – 1, 3, 5



763 and 7 days). Schistosomula were electroporated with 10 µg of either *luc*, *smache1*, *smbche1* or  
764 *smache3* siRNA or a combination of all three *smche* siRNAs (30 µg total) using a Bio-Rad  
765 Gene Pulser Xcell (single 20 ms pulse – 125 V, 25 µF capacitance, 200 Ω resistance, square  
766 wave electroporation) at RT, added to 24 well plates containing 1 ml pre-warmed SFB and  
767 incubated (37°C, 5% CO<sub>2</sub>) for 7 days. Schistosomula were harvested at each timepoint and  
768 approximately 1,000 parasites were used for qPCR analysis (to assess transcript knockdown),  
769 1,700 parasites were used for protein extract preparation (to examine phenotypic knockdown)  
770 and 300 parasites were used for Trypan Blue exclusion assays (to determine parasite viability).  
771 All parasite material was generated and separately analyzed from 2 independent experiments.

772

#### 773 ***Determination of viability in siRNA-treated schistosomula***

774 Schistosomula (100 parasites/replicate) were harvested at each timepoint and viability was  
775 determined by Trypan Blue exclusion staining [78]. Briefly, schistosomula were stained with  
776 0.16% Trypan Blue in PBS with gentle shaking for 30 min at RT and then excess stain was  
777 removed by multiple washes in PBS before fixing in 10% formalin. Parasites were counted  
778 under 10× objective and live parasites (which had not taken up stain) were expressed as a  
779 percentage of total worms. Each assay was performed in triplicate.

780

#### 781 ***Evaluation of protein expression in siRNA-treated schistosomula***

782 Western blots were performed with day-7 parasite extracts (20 µg) following standard  
783 procedures. The blots were probed with the anti-*SmChE* antibodies (1:1000 in PBST) generated  
784 herein. A polyclonal anti-*Sm*-paramyosin antibody [77] was used as a loading control.

785

786



787 ***Glucose uptake in schistosomula treated with siRNA***

788 In a separate RNAi experiment, newly transformed schistosomula (5,000/treatment) were  
789 incubated for 5 days in SFB. Parasites were then electroporated with siRNAs as described  
790 above and finally transferred to serum-free DMEM (1 mg/ml glucose) supplemented with  
791 4×AA. Media (50 µl) from each experiment was collected 72 h post-treatment and the amount  
792 of glucose was quantified using a colorimetric glucose assay kit (Sigma) following the  
793 manufacturer's instructions. Parasite viability at this timepoint was determined by Trypan Blue  
794 exclusion and transcript levels of each *smche*, as well as the glucose transporters *sgtp1* and  
795 *sgtp4*, were also measured. Glucose levels were normalized according to the number of  
796 parasites and expressed relative to the *luc* group. Data is the average of 2 biological and 3  
797 technical replicates ± SEM.

798

799 ***Infection of mice with SmChE siRNA-treated schistosomula***

800 One-day-old schistosomula (10,000) were electroporated as above in 500 µl of SFB with 50  
801 µg of either *luc*, *smache1*, *smbche1* or *smache3* siRNA or a combination of all three *smche*  
802 siRNAs (150 µg total). Parasites were injected intramuscularly into both thighs (1,000 per  
803 thigh) of male 6-8 week BALB/c mouse (5 mice per treatment group) using a 23-gauge needle.  
804 A control group of mice were similarly injected with non-electroporated schistosomula. Adult  
805 worms were perfused 20 days later to assess the number of worms that had matured and reached  
806 the mesenteries. Experiments were performed independently in duplicate. After each  
807 experiment, transcript levels of each *smche* from surviving worms were assessed using real-  
808 time qPCR.

809

810

811 ***Bio-scavenging of carboxylic esters by SmBChE1***

812 To test the hypothesis that *SmBChE1* may play a role in the bio-scavenging of AChE-inhibitory  
813 molecules, we first sought to determine whether inhibition of BChE activity would potentiate  
814 the AChE-inhibitory and anti-schistosome effects of organophosphates (OP)s. Schistosomula  
815 extracts (20 µg) were diluted in assay buffer, then iso-OMPA was added to a final concentration  
816 of either 1 or 2 mM and incubated for 20 min at RT. DDVP was then added to a final  
817 concentration of 1 µM and the samples were further incubated for 20 min at RT; the final  
818 reaction volume was 180 µl. ACh (final concentration 2 mM) and DTNB (final concentration  
819 0.5 mM) were then added and the absorbance was monitored every 5 min at 405 nm in a  
820 Polarstar Omega microplate reader (BMG Labtech). Extracts that were not treated with iso-  
821 OMPA with or without DDVP treatment were used as controls. Experiments were performed  
822 in triplicate with data presented as the mean ± SEM.

823 The same experiments were performed on live schistosomula using either an inhibitor- or  
824 RNAi-based approach. For the inhibitor-based experiment, 24 h schistosomula  
825 (1,000/treatment in 1 ml SFB) were pretreated with iso-OMPA at the non-lethal concentration  
826 of 100 µM and, 1 h after iso-OMPA treatment, schistosomula were treated with 1 µM DDVP  
827 and cultured for 5 h at 37°C in 5% CO<sub>2</sub>. Parasites that were not treated with iso-OMPA but  
828 treated with DDVP were used as controls. For the RNAi-based experiment, 24 h schistosomula  
829 (1,500/100 µl SFB) were electroporated with 10 µg of either *smbchel* or *luc* siRNA as  
830 described above, added to 24 well plates containing 1 ml pre-warmed SFB and incubated  
831 (37°C, 5% CO<sub>2</sub>) for 3 days before being treated with 1 µM DDVP and cultured for a further 5  
832 h. For both inhibitor- and RNAi-based experiments, schistosomula viability was determined  
833 using Trypan Blue staining and data is presented as the mean ± SEM of 2 biological and 3  
834 technical replicates.

835 In a reverse testing of the bio-scavenging hypothesis, we sought to determine whether addition  
836 of *Sm*BChE could mitigate the effects of DDVP. Ten micrograms of f*Sm*BChE1 was pre-  
837 incubated with 1  $\mu$ M final concentration DDVP in AChE assay buffer (170  $\mu$ l final volume) for  
838 20 min at RT. Schistosomula extracts (20  $\mu$ g), ACh (final concentration 2 mM) and DTNB  
839 (final concentration 0.5 mM) were then added and the absorbance was monitored every 5 min  
840 at 405 nm in a Polarstar Omega microplate reader. Reactions without f*Sm*BChE or  
841 without DDVP were used as controls. Experiments were performed in triplicate with data  
842 presented as the mean  $\pm$  SEM. Again, the same experiments were performed on live  
843 schistosomula. After the pre-treatment of different amounts of f*Sm*BChE (10, 5, and 2.5  $\mu$ g)  
844 with 1  $\mu$ M DDVP in 500  $\mu$ l SFB, 24 h schistosomula (1,000/treatment in 500  $\mu$ l SFB) were  
845 added, incubated at 37°C and 5% CO<sub>2</sub> for 24 h and then parasite viability was measured by  
846 Trypan Blue staining. Experiments where a similarly expressed and purified, but irrelevant,  
847 protein (*Sm*TSP2) was used instead of f*Sm*BChE, and schistosomula cultured in media alone,  
848 were used as controls. Data is presented as the mean  $\pm$  SEM of 2 biological and 3 technical  
849 replicates.

850

### 851 ***Statistical analyses***

852 Data were reported as the means  $\pm$  SEM. Statistical differences were assessed using  
853 the student's *t* test. *P* values less than 0.05 were considered statistically significant.

854

### 855 **References**

856 1. Girard E, Bernard V, Minic J, Chatonnet A, Krejci E, Molgó J. Butyrylcholinesterase  
857 and the control of synaptic responses in acetylcholinesterase knockout mice. *Life Sciences*.  
858 2007;80(24):2380-5. doi: <https://doi.org/10.1016/j.lfs.2007.03.011>.

859 2. Massoulie J, Pezzementi L, Bon S, Krejci E, Vallette FM. Molecular and cellular  
860 biology of cholinesterases. *Progress in neurobiology*. 1993;41(1):31-91. Epub 1993/07/01.  
861 PubMed PMID: 8321908.

- 862 3. Lockridge O. Review of human butyrylcholinesterase structure, function, genetic  
863 variants, history of use in the clinic, and potential therapeutic uses. *Pharmacol Ther.*  
864 2015;148:34-46. Epub 2014/12/03. doi: 10.1016/j.pharmthera.2014.11.011. PubMed PMID:  
865 25448037.
- 866 4. Silman I, Sussman JL. Acetylcholinesterase: 'classical' and 'non-classical' functions and  
867 pharmacology. *Curr Opin Pharmacol.* 2005;5(3):293-302. Epub 2005/05/24. doi:  
868 10.1016/j.coph.2005.01.014. PubMed PMID: 15907917.
- 869 5. Soreq H, Seidman S. Acetylcholinesterase--new roles for an old actor. *Nature reviews:*  
870 *Neuroscience.* 2001;2(4):294-302. Epub 2001/04/03. doi: 10.1038/35067589. PubMed PMID:  
871 11283752.
- 872 6. Kimber MJ, Fleming CC. Neuromuscular function in plant parasitic nematodes: a target  
873 for novel control strategies? *Parasitology.* 2005;131(S1):S129-S42. doi:  
874 10.1017/S0031182005009157.
- 875 7. McVeigh P, Kimber MJ, Novozhilova E, Day TA. Neuropeptide signalling systems in  
876 flatworms. *Parasitology.* 2005;131(S1):S41-S55. doi: 10.1017/S0031182005008851.
- 877 8. Ribeiro P, El-Shehabi F, Patocka N. Classical transmitters and their receptors in  
878 flatworms. *Parasitology.* 2005;131 Suppl:S19-40. Epub 2006/03/30. doi:  
879 10.1017/s0031182005008565. PubMed PMID: 16569290.
- 880 9. Sangster NC, Song J, Demeler J. Resistance as a tool for discovering and understanding  
881 targets in parasite neuromusculature. *Parasitology.* 2005;131(S1):S179-S90. doi:  
882 10.1017/S0031182005008656.
- 883 10. Vermeire JJ, Humphries JE, Yoshino TP. Signal transduction in larval trematodes:  
884 putative systems associated with regulating larval motility and behaviour. *Parasitology.*  
885 2005;131(S1):S57-S70. doi: 10.1017/S0031182005008358.
- 886 11. Halton DW, Gustafsson MKS. Functional morphology of the platyhelminth nervous  
887 system. *Parasitology.* 1996;113(SupplementS1):S47-S72. doi:  
888 doi:10.1017/S0031182000077891.
- 889 12. Ribeiro P, Geary T. Neuronal signaling in schistosomes: Current status and prospects  
890 for post-genomics. *Canadian Journal of Zoology/Revue Canadienne de Zoologie.* 2010;88 1-  
891 22.
- 892 13. Arnon R, Silman I, Tarrab-Hazdai R. Acetylcholinesterase of *Schistosoma mansoni* -  
893 Functional correlates - Contributed in honor of Professor Hans Neurath's 90th birthday. *Protein*  
894 *Science.* 1999;8(12):2553-61. PubMed PMID: WOS:000084314100001.
- 895 14. Bentley GN, Jones AK, Agnew A. Mapping and sequencing of acetylcholinesterase  
896 genes from the platyhelminth blood fluke *Schistosoma*. *Gene.* 2003;314:103-12. doi:  
897 10.1016/s0378-1119(03)00709-1. PubMed PMID: WOS:000186113200010.

- 898 15. Bentley GN, Jones AK, Agnew A. Expression and comparative functional  
899 characterisation of recombinant acetyl cholinesterase from three species of *Schistosoma*.  
900 Molecular and Biochemical Parasitology. 2005;141(1):119-23. doi:  
901 10.1016/j.molbiopara.2005.01.019. PubMed PMID: WOS:000228680600013.
- 902 16. You H, Gobert GN, Du X, Pali G, Cai P, Jones MK, et al. Functional characterisation  
903 of *Schistosoma japonicum* acetylcholinesterase. Parasites & Vectors. 2016;9:328. doi:  
904 10.1186/s13071-016-1615-1. PubMed PMID: PMC4901427.
- 905 17. Berriman M, Haas BJ, LoVerde PT, Wilson RA, Dillon GP, Cerqueira GC, et al. The  
906 genome of the blood fluke *Schistosoma mansoni*. Nature. 2009;460(7253):352-8. doi:  
907 [http://www.nature.com/nature/journal/v460/n7253/supinfo/nature08160\\_S1.html](http://www.nature.com/nature/journal/v460/n7253/supinfo/nature08160_S1.html).
- 908 18. Paraoanu LE, Layer PG. Acetylcholinesterase in cell adhesion, neurite growth and  
909 network formation. Febs j. 2008;275(4):618-24. Epub 2008/01/22. doi: 10.1111/j.1742-  
910 4658.2007.06237.x. PubMed PMID: 18205832.
- 911 19. Zhang X-J, Greenberg DS. Acetylcholinesterase involvement in apoptosis. Frontiers in  
912 Genetics. 2012;5. doi: 10.3389/fnmol.2012.00040.
- 913 20. Espinoza B, Tarrab-Hazdai R, Himmeloch S, Arnon R. Acetylcholinesterase from  
914 *Schistosoma mansoni*: immunological characterization. Immunology letters. 1991;28(2):167-  
915 74. doi: 10.1016/0165-2478(91)90116-R.
- 916 21. Jones AK, Bentley GN, Parra WGO, Agnew A. Molecular characterization of an  
917 acetylcholinesterase implicated in the regulation of glucose scavenging by the parasite  
918 *Schistosoma*. FASEB Journal. 2002;16(1):441-. doi: 10.1096/fj.01-0683fje.
- 919 22. Camacho M, Agnew A. *Schistosoma*: Rate of glucose import is altered by acetylcholine  
920 interaction with tegumental acetylcholine receptors and acetylcholinesterase. Experimental  
921 Parasitology. 1995;81(4):584-91. doi: 10.1006/expr.1995.1152. PubMed PMID:  
922 WOS:A1995TN32400019.
- 923 23. Sundaraneedi MK, Tedla BA, Eichenberger RM, Becker L, Pickering D, Smout MJ, et  
924 al. Polypyridylruthenium(II) complexes exert anti-schistosome activity and inhibit parasite  
925 acetylcholinesterases. PLoS neglected tropical diseases. 2017;11(12):e0006134. Epub  
926 2017/12/15. doi: 10.1371/journal.pntd.0006134. PubMed PMID: 29240773; PubMed Central  
927 PMCID: PMC5746282.
- 928 24. You H, Liu C, Du X, Nawaratna S, Rivera V, Harvie M, et al. Suppression of  
929 *Schistosoma japonicum* acetylcholinesterase affects parasite growth and development.  
930 International Journal of Molecular Sciences. 2018;19(8):2426. PubMed PMID:  
931 doi:10.3390/ijms19082426.
- 932 25. Camacho M, Alsford S, Jones A, Agnew A. Nicotinic acetylcholine receptors on the  
933 surface of the blood fluke *Schistosoma*. Molecular and biochemical parasitology.  
934 1995;71(1):127-34. Epub 1995/04/01. PubMed PMID: 7630376.

- 935 26. Skelly PJ, Da'dara AA, Li X-H, Castro-Borges W, Wilson RA. Schistosome Feeding  
936 and Regurgitation. PLoS Pathogens. 2014;10(8):e1004246. doi:  
937 10.1371/journal.ppat.1004246. PubMed PMID: PMC4133383.
- 938 27. Hussein AS, Harel M, Selkirk ME. A distinct family of acetylcholinesterases is secreted  
939 by *Nippostrongylus brasiliensis*. Molecular and Biochemical Parasitology. 2002;123(2):125-  
940 34. PubMed PMID: WOS:000178735800005.
- 941 28. Lawrence CE, Pritchard DI. Differential secretion of acetylcholinesterase and proteases  
942 during the development of *Heligmosomoides polygyrus*. Int J Parasitol. 1993;23(3):309-14.  
943 Epub 1993/05/01. PubMed PMID: 8359979.
- 944 29. Rathaur S, Robertson BD, Selkirk ME, Maizels RM. Secretory acetylcholinesterases  
945 from *Brugia malayi* adult and microfilarial parasites. Mol Biochem Parasitol. 1987;26(3):257-  
946 65. Epub 1987/12/01. PubMed PMID: 3123928.
- 947 30. Selkirk ME, Lazari O, Hussein AS, Matthews JB. Nematode acetylcholinesterases are  
948 encoded by multiple genes and perform non-overlapping functions. Chemico-Biological  
949 Interactions. 2005;157:263-8. doi: 10.1016/j.cbi.2005.10.039. PubMed PMID:  
950 WOS:000234337000036.
- 951 31. Vaux R, Schnoeller C, Berkachy R, Roberts LB, Hagen J, Gounaris K, et al. Modulation  
952 of the Immune Response by Nematode Secreted Acetylcholinesterase Revealed by  
953 Heterologous Expression in *Trypanosoma musculi*. PLoS Pathog. 2016;12(11):e1005998.  
954 Epub 2016/11/02. doi: 10.1371/journal.ppat.1005998. PubMed PMID: 27802350; PubMed  
955 Central PMCID: PMC5089771.
- 956 32. Dvir H, Silman I, Harel M, Rosenberry TL, Sussman JL. Acetylcholinesterase: from  
957 3D structure to function. Chem Biol Interact. 2010;187(1-3):10-22. Epub 2010/02/09. doi:  
958 10.1016/j.cbi.2010.01.042. PubMed PMID: 20138030; PubMed Central PMCID:  
959 PMCPmc2894301.
- 960 33. Bueding E. Acetylcholinesterase activity of *Schistosoma mansoni*. British journal of  
961 pharmacology and chemotherapy. 1952;7(4):563-6. PubMed PMID: MEDLINE:13019023.
- 962 34. Basch PF. Why do schistosomes have separate sexes? Parasitol Today. 1990;6(5):160-  
963 3. Epub 1990/05/01. PubMed PMID: 15463329.
- 964 35. Mack A, Robitzki A. The key role of butyrylcholinesterase during neurogenesis and  
965 neural disorders: an antisense-5'butyrylcholinesterase-DNA study. Prog Neurobiol.  
966 2000;60(6):607-28. Epub 2000/03/30. PubMed PMID: 10739090.
- 967 36. Parker-Manuel SJ, Ivens AC, Dillon GP, Wilson RA. Gene Expression Patterns in  
968 Larval *Schistosoma mansoni* Associated with Infection of the Mammalian Host. PLOS  
969 Neglected Tropical Diseases. 2011;5(8):e1274. doi: 10.1371/journal.pntd.0001274.



- 970 37. Gobert GN, Chai M, McManus DP. Biology of the schistosome lung-stage  
971 schistosomulum. *Parasitology*. 2007;134(Pt 4):453-60. doi: 10.1017/S0031182006001648.  
972 PubMed PMID: PMC2754249.
- 973 38. Arnon R, Espinoza-Ortega B, Tarrab-Hazdai R. Acetylcholinesterase of *Schistosoma*  
974 *mansoni*: an antigen of functional implications. *Memórias do Instituto Oswaldo Cruz*.  
975 1987;82:163-70.
- 976 39. Camacho M, Tarrab-Hazdai R, Espinoza B, Arnon R, Agnew A. The amount of  
977 acetylcholinesterase on the parasite surface reflects the differential sensitivity of schistosome  
978 species to metrifonate. *Parasitology*. 1994;108 ( Pt 2):153-60. Epub 1994/02/01. PubMed  
979 PMID: 8159460.
- 980 40. Mackintosh C. Dynamic interactions between 14-3-3 proteins and phosphoproteins  
981 regulate diverse cellular processes. *Biochemical Journal*. 2004;381(Pt 2):329-42. doi:  
982 10.1042/BJ20031332. PubMed PMID: PMC1133837.
- 983 41. Lee DL. Why do some nematode parasites of alimentary tract secrete  
984 acetylcholinesterase? *International Journal for Parasitology*. 1996;26(5):499-508. doi:  
985 10.1016/0020-7519(96)00040-9. PubMed PMID: WOS:A1996UW68100004.
- 986 42. Lee DL. The fine structure of the excretory system in adult *Nippostrongylus brasiliensis*  
987 (Nematoda) and a suggested function for the 'excretory glands'. *Tissue & cell*. 1970;2(2):225-  
988 31. Epub 1970/01/01. PubMed PMID: 18631510.
- 989 43. Mesulam MM, Guillozet A, Shaw P, Levey A, Duysen EG, Lockridge O.  
990 Acetylcholinesterase knockouts establish central cholinergic pathways and can use  
991 butyrylcholinesterase to hydrolyze acetylcholine. *Neuroscience*. 2002;110(4):627-39. Epub  
992 2002/04/06. PubMed PMID: 11934471.
- 993 44. Li B, Stribley JA, Ticu A, Xie W, Schopfer LM, Hammond P, et al. Abundant tissue  
994 butyrylcholinesterase and its possible function in the acetylcholinesterase knockout mouse.  
995 *Journal of neurochemistry*. 2000;75(3):1320-31. Epub 2000/08/11. PubMed PMID: 10936216.
- 996 45. Greenspan RJ, Finn JA, Jr., Hall JC. Acetylcholinesterase mutants in *Drosophila* and  
997 their effects on the structure and function of the central nervous system. *The Journal of*  
998 *comparative neurology*. 1980;189(4):741-74. Epub 1980/02/15. doi: 10.1002/cne.901890409.  
999 PubMed PMID: 6769980.
- 1000 46. Xie W, Stribley JA, Chatonnet A, Wilder PJ, Rizzino A, McComb RD, et al. Postnatal  
1001 developmental delay and supersensitivity to organophosphate in gene-targeted mice lacking  
1002 acetylcholinesterase. *The Journal of pharmacology and experimental therapeutics*.  
1003 2000;293(3):896-902. Epub 2000/06/28. PubMed PMID: 10869390.
- 1004 47. Smith H, Doenhoff M, Aitken C, Bailey W, Ji M, Dawson E, et al. Comparison of  
1005 *Schistosoma mansoni* soluble cercarial antigens and soluble egg antigens for serodiagnosing

- 1006 schistosome infections. PLOS Neglected Tropical Diseases. 2012;6(9):e1815. doi:  
1007 10.1371/journal.pntd.0001815.
- 1008 48. X.-M. H, L.-W. Y, G.-L. H, Q.-P. Y, Z.-J. H, F. L. RNA interference of *ace1* and *ace2*  
1009 in *Chilo suppressalis* reveals their different contributions to motor ability and larval growth.  
1010 Insect Molecular Biology. 2011;20(4):507-18. doi: doi:10.1111/j.1365-2583.2011.01081.x.
- 1011 49. Lu Y, Park Y, Gao X, Zhang X, Yao J, Pang Y-P, et al. Cholinergic and non-cholinergic  
1012 functions of two acetylcholinesterase genes revealed by gene-silencing in *Tribolium*  
1013 *castaneum*. Scientific Reports. 2012;2:288. doi: 10.1038/srep00288. PubMed PMID:  
1014 PMC3286809.
- 1015 50. Hussein AS, Kichenin K, Selkirk ME. Suppression of secreted acetylcholinesterase  
1016 expression in *Nippostrongylus brasiliensis* by RNA interference. Molecular and Biochemical  
1017 Parasitology. 2002;122(1):91-4. doi: 10.1016/s0166-6851(02)00068-3. PubMed PMID:  
1018 WOS:000177290900009.
- 1019 51. Johnson CD, Rand JB, Herman RK, Stern BD, Russell RL. The acetylcholinesterase  
1020 genes of *C. elegans*: Identification of a third gene (*ace-3*) and mosaic mapping of a synthetic  
1021 lethal phenotype. Neuron. 1988;1(2):165-73. doi: [https://doi.org/10.1016/0896-](https://doi.org/10.1016/0896-6273(88)90201-2)  
1022 [6273\(88\)90201-2](https://doi.org/10.1016/0896-6273(88)90201-2).
- 1023 52. Lang GJ, Zhu KY, Zhang CX. Can acetylcholinesterase serve as a target for developing  
1024 more selective insecticides? Current drug targets. 2012;13(4):495-501. Epub 2012/01/28.  
1025 PubMed PMID: 22280346.
- 1026 53. Bueding E, Liu CL, Rogers SH. Inhibition by metrifonate and DDVP of cholinesterases  
1027 in schistosomes. British journal of pharmacology. 1972;46(3):480-7. doi: 10.1111/j.1476-  
1028 5381.1972.tb08145.x.
- 1029 54. Davis A, Bailey DR. Metrifonate in urinary schistosomiasis. Bulletin of the World  
1030 Health Organization. 1969;41(2):209-24. Epub 1969/01/01. PubMed PMID: 5308698;  
1031 PubMed Central PMCID: PMC PMC2427421.
- 1032 55. Feldmeier H, Doehring E, Daffala AA, Omer AH, Dietrich M. Efficacy of metrifonate  
1033 in urinary schistosomiasis: comparison of reduction of *Schistosoma haematobium* and  
1034 *Schistosoma mansoni* eggs. The American journal of tropical medicine and hygiene.  
1035 1982;31(6):1188-94. Epub 1982/11/01. PubMed PMID: 6890775.
- 1036 56. Sundaraneedi M, Eichenberger RM, Al-Hallaf R, Yang D, Sotillo J, Rajan S, et al.  
1037 Polypyridylruthenium(II) complexes exert *in vitro* and *in vivo* nematocidal activity and show  
1038 significant inhibition of parasite acetylcholinesterases. International Journal for Parasitology:  
1039 Drugs and Drug Resistance. 2018;8(1):1-7. Epub 2017/12/06. doi:  
1040 10.1016/j.ijpddr.2017.11.005. PubMed PMID: 29207309; PubMed Central PMCID:  
1041 PMCPMC5724747.



- 1042 57. Pritchard DI. Why do some parasitic nematodes secrete acetylcholinesterase (AChE)?  
1043 International journal for parasitology. 1993;23(5):549-50. Epub 1993/08/01. PubMed PMID:  
1044 8225755.
- 1045 58. Felder CE, Botti SA, Lifson S, Silman I, Sussman JL. External and internal electrostatic  
1046 potentials of cholinesterase models. J Mol Graph Model. 1997;15(5):318-27, 35-7. Epub  
1047 1998/06/26. PubMed PMID: 9640563.
- 1048 59. Soreq H, Seidman S. Acetylcholinesterase — new roles for an old actor. Nature  
1049 Reviews Neuroscience. 2001;2:294. doi: 10.1038/35067589.
- 1050 60. Bueding E, Schiller EL, Bourgeois JG. Some physiological, biochemical, and  
1051 morphologic effects of tris (p-aminophenyl) carbonium salts (TAC) on *Schistosoma mansoni*.  
1052 The American journal of tropical medicine and hygiene. 1967;16(4):500-15. Epub 1967/07/01.  
1053 PubMed PMID: 4952150.
- 1054 61. Ittiprasert W, Mann VH, Karinshak SE, Coghlan A, Rinaldi G, Sankaranarayanan G, et  
1055 al. Programmed genome editing of the omega-1 ribonuclease of the blood fluke, *Schistosoma*  
1056 *mansoni*. bioRxiv. 2018:358424. doi: 10.1101/358424.
- 1057 62. McGehee DS, Krasowski MD, Fung DL, Wilson B, Gronert GA, Moss J.  
1058 Cholinesterase inhibition by potato glycoalkaloids slows mivacurium metabolism.  
1059 Anesthesiology. 2000;93(2):510-9. PubMed PMID: 10910502.
- 1060 63. Perrett S, Whitfield PJ. Atanine (3-dimethylallyl-4-methoxy-2-quinolone), an alkaloid  
1061 with anthelmintic activity from the Chinese medicinal plant, *Evodia rutaecarpa*. Planta Med.  
1062 1995;61(3):276-8. doi: 10.1055/s-2006-958073. PubMed PMID: 7617774.
- 1063 64. Saxena A, Sun W, Luo C, Myers TM, Koplovitz I, Lenz DE, et al. Bioscavenger for  
1064 protection from toxicity of organophosphorus compounds. J Mol Neurosci. 2006;30(1-2):145-  
1065 8. Epub 2006/12/29. PubMed PMID: 17192662.
- 1066 65. Boudinot E, Taysse L, Daulon S, Chatonnet A, Champagnat J, Foutz AS. Effects of  
1067 acetylcholinesterase and butyrylcholinesterase inhibition on breathing in mice adapted or not  
1068 to reduced acetylcholinesterase. Pharmacology biochemistry and behavior. 2005;80(1):53-61.  
1069 Epub 2005/01/18. doi: 10.1016/j.pbb.2004.10.014. PubMed PMID: 15652380.
- 1070 66. De Vriese C, Gregoire F, Lema-Kisoka R, Waelbroeck M, Robberecht P, Delporte C.  
1071 Ghrelin degradation by serum and tissue homogenates: identification of the cleavage sites.  
1072 Endocrinology. 2004;145(11):4997-5005. Epub 2004/07/17. doi: 10.1210/en.2004-0569.  
1073 PubMed PMID: 15256494.
- 1074 67. Adzhubei AA, Sternberg MJ, Makarov AA. Polyproline-II helix in proteins: structure  
1075 and function. J Mol Biol. 2013;425(12):2100-32. Epub 2013/03/20. doi:  
1076 10.1016/j.jmb.2013.03.018. PubMed PMID: 23507311.

- 1077 68. Ramalho-Pinto FJ, Gazzinelli G, Howells RE, Mota-Santos TA, Figueiredo EA,  
1078 Pellegrino J. *Schistosoma mansoni*: defined system for stepwise transformation of cercaria to  
1079 schistosomule *in vitro*. Experimental parasitology. 1974;36(3):360-72. Epub 1974/12/01.  
1080 PubMed PMID: 4139038.
- 1081 69. Lewis FA, Stirewalt MA, Souza CP, Gazzinelli G. Large-scale laboratory maintenance  
1082 of *Schistosoma mansoni*, with observations on three schistosome/snail host combinations. The  
1083 Journal of parasitology. 1986;72(6):813-29. Epub 1986/12/01. PubMed PMID: 3546654.
- 1084 70. Basch PF. Cultivation of *Schistosoma mansoni* *In vitro*. I. Establishment of cultures  
1085 from cercariae and development until pairing. The Journal of parasitology. 1981;67(2):179-85.  
1086 Epub 1981/04/01. PubMed PMID: 7241277.
- 1087 71. Sotillo J, Pearson M, Becker L, Mulvenna J, Loukas A. A quantitative proteomic  
1088 analysis of the tegumental proteins from *Schistosoma mansoni* schistosomula reveals novel  
1089 potential therapeutic targets. International journal for parasitology. 2015;45(8):505-16. doi:  
1090 10.1016/j.ijpara.2015.03.004.
- 1091 72. Kumar S, Stecher G, Tamura K. MEGA7: Molecular Evolutionary Genetics Analysis  
1092 Version 7.0 for Bigger Datasets. Mol Biol Evol. 2016;33(7):1870-4. Epub 2016/03/24. doi:  
1093 10.1093/molbev/msw054. PubMed PMID: 27004904.
- 1094 73. Long T, Neitz RJ, Beasley R, Kalyanaraman C, Suzuki BM, Jacobson MP, et al.  
1095 Structure-Bioactivity Relationship for Benzimidazole Thiophene Inhibitors of Polo-Like  
1096 Kinase 1 (PLK1), a Potential Drug Target in *Schistosoma mansoni*. PLOS Neglected Tropical  
1097 Diseases. 2016;10(1):e0004356. doi: 10.1371/journal.pntd.0004356.
- 1098 74. Schmittgen TD, Livak KJ. Analyzing real-time PCR data by the comparative C(T)  
1099 method. Nat Protoc. 2008;3(6):1101-8. Epub 2008/06/13. PubMed PMID: 18546601.
- 1100 75. Ellman GL, Courtney KD, Andres V, Featherstone RM. A new and rapid colorimetric  
1101 determination of acetylcholinesterase activity. Biochemical Pharmacology. 1961;7(2):88-95.  
1102 doi: [https://doi.org/10.1016/0006-2952\(61\)90145-9](https://doi.org/10.1016/0006-2952(61)90145-9).
- 1103 76. Hodgson AJ, Chubb IW. A method for the detection and quantitation of secretory  
1104 acetylcholinesterase. Neurochemical Pathology. 1983;1(3):211. doi: 10.1007/bf02834246.
- 1105 77. Tran MH, Pearson MS, Bethony JM. Tetraspanins on the surface of *Schistosoma*  
1106 *mansoni* are protective antigens against schistosomiasis. Nature Medicine 2006;12(7):835.
- 1107 78. Wangchuk P, Giacomini PR, Pearson MS, Smout MJ, Loukas A. Identification of lead  
1108 chemotherapeutic agents from medicinal plants against blood flukes and whipworms.  
1109 Scientific Reports. 2016;6:32101. doi: 10.1038/srep32101.
- 1110
- 1111

1112 **Figure captions**

1113 **Figure 1. The amino acid sequence alignment and phylogeny of ChEs from *S. mansoni***  
1114 **and other species.** Light blue arrowheads = the 14 aromatic rings, black arrowheads =  
1115 oxyanion holes, S= salt bridges, red boxes= PAS, yellow boxes = catalytic triad, green boxes  
1116 = acyl binding pocket, numbered arrows = disulfide bonds and magenta box = peripheral  
1117 anionic site. Accession numbers: *H. sapiens* (NP000656), *T. californica* (CAA27169), *C.*  
1118 *elegans* (NP510660), *SmAChE1* (Smp\_154600), *SmBChE1* (Smp\_125350), *SmAChE3*  
1119 (Smp\_136690).

1120

1121 **Figure 2. Developmental expression profiles of *smache1*, *smbche1* and *smache3*.** The  
1122 expression of (A) *smache1*, (B) *smbche1* and (C) *smache3* genes at different developmental  
1123 stages of *S. mansoni* as quantified by qPCR analysis. (D) The heat map shows the comparative  
1124 expression pattern of the paralogs in each developmental stage. Data are presented as  
1125 mean  $\pm$  SEM of five independent experiments and are normalized to the *smcox1*  
1126 housekeeping gene.

1127

1128 **Figure 3. Immunofluorescent localization of *SmChEs*.** Fluorescence and brightfield images  
1129 of (A) male (M) and female (F) *S. mansoni* and *S. haematobium* adult worm sections. (B) Live,  
1130 fixed cercariae, and schistosomula at 3 h, 24 h, 3 days and 5 days after transformation. Both  
1131 adult sections and juvenile parasites were labeled with either anti-*SmAChE1*, anti-*SmBChE1*  
1132 or anti-*SmAChE3* primary antibody (1:100 in PBST) followed by goat-anti-mouse IgG-  
1133 alexafluor 647 (1:200 in PBST). Naive mouse sera was used as a negative control.

1134

1135 **Figure 4. Enzymatic activity of f*SmChEs*.** (A) Cholinergic substrate preference (AcSCh or  
1136 BcSCh) of each f*SmChE*. (B) Inhibition of f*SmAChE1* and f*SmAChE3* with DDVP (AcSCh

1137 used as a substrate) and inhibition of fSmBChE1 with iso-OMPA (BcSCh used as a substrate).  
1138 Data are presented as mean  $\pm$  SEM of triplicate experiments and differences between groups  
1139 were measured by the student's *t* test. \* $P \leq 0.05$ , \*\* $P \leq 0.01$ , \*\*\* $P \leq 0.001$ .

1140

1141 **Figure 5. BChE and secreted ChE activity in schistosomes.** (A) BChE activity in *S. mansoni*  
1142 adults and schistosomula TX-100 extracts. (B) BChE activity in TX-100 extracts from *S.*  
1143 *mansoni* and *S. haematobium*. (C) AChE and (D) BChE activity of ES products from different  
1144 developmental stages of *S. mansoni*. (E) AChE activity and (F) SDS-PAGE analysis of purified,  
1145 secreted *SmChEs*. Data are presented as mean  $\pm$  SEM of triplicate experiments and differences  
1146 between groups were measured by the student's *t* test. \* $P \leq 0.05$ , \*\* $P \leq 0.01$ .

1147

1148 **Figure 6. Suppression of *smche* mRNA transcript and protein expression in**  
1149 **schistosomula by RNAi.** Individual siRNA treatment with (A) *smache1*, (B) *smbche1* or (C)  
1150 *smache3* siRNAs. (D) Treatment with a cocktail of *smache1*, *smbche1* and *smache3* siRNAs.  
1151 Transcript levels of each *smche* in parasites treated with *smche* siRNAs are shown relative to  
1152 *smche* transcript expression in schistosomula treated with the *luc* control siRNA (dashed line)  
1153 and represent the mean  $\pm$  SEM of triplicate qPCR assays from 2 biological replicates of each  
1154 treatment. Transcript expression in all parasites was normalized with the housekeeping gene,  
1155 *smcox1*. Differences in transcript levels (relative to the *luc* control) were measured by the  
1156 student's *t* test. \* $P \leq 0.05$ , \*\* $P \leq 0.01$ , \*\*\* $P \leq 0.001$ . (E) Western blot of day 7 schistosomula  
1157 extracts following treatment with *smche* or *luc* siRNAs. Extracts were immunoblotted with the  
1158 corresponding anti-*SmAChE1*, anti-*SmBChE* or anti-*SmAChE3* polyclonal antibody. An  
1159 antibody against *SmPmy* (paramyosin) was used as a loading control.

1160

1161 **Figure 7. Effects of *smche* knockdown on cholinesterase activity and glucose uptake.** (A)  
1162 AChE activity of extracts from schistosomula treated with *smache1*, *smache3* or *luc* siRNAs  
1163 (dashed line). (B) BChE activity of extracts from schistosomula treated with *smbche1* or *luc*  
1164 siRNAs (dashed line). (C) AChE activity of extracts from schistosomula treated with all 3  
1165 siRNAs or *luc* siRNA (dashed line). (D) Glucose uptake by schistosomula 48 h after treatment  
1166 with *smche* siRNAs. Schistosomula (5 days old – 5,000/treatment) were electroporated with  
1167 either *luc* or *smche* siRNAs and glucose consumption was measured 48 h after treatment. Data  
1168 represents mean  $\pm$  SEM of duplicate assays from 2 biological replicates of each treatment.  
1169 Differences (relative to the *luc* control) were measured by the student's *t* test.  $**P \leq 0.01$ ,  $***P$   
1170  $\leq 0.001$ .

1171

1172 **Figure 8. Effects of *smche* silencing on schistosomula viability *in vitro* and development**  
1173 ***in vivo*.** (A) Schistosomula treated with individual or a cocktail of all 3 *smche* siRNAs or *luc*  
1174 siRNA were cultured for 7 days in complete Basch medium with viability determined at day 1,  
1175 3, 5 and 7 after treatment by Trypan Blue exclusion (mean  $\pm$  SEM of duplicate assays from 2  
1176 biological replicates of each treatment). (B and C) One-day-old schistosomula treated with  
1177 individual or a cocktail of all three *smche* siRNAs or *luc* siRNA were intramuscularly injected  
1178 (2,000 parasites) into mice. After 3 weeks, adult worms were recovered and counted. Data from  
1179 two independent experiments are shown. Differences between *smche*- and *luc*-treated groups  
1180 were measured by the student's *t* test.  $*P \leq 0.05$ ,  $**P \leq 0.01$ ,  $***P \leq 0.001$ .

1181

1182 **Figure 9. *SmBChE1* bio-scavenges DDVP and protects parasites against DDVP-induced**  
1183 **effects.** (A) Schistosomula extracts were treated with DDVP (1  $\mu$ M), or pretreated with iso-  
1184 OMPA (1 and 2 mM) and then DDVP, before assaying AChE activity. (B) Schistosomula were  
1185 treated with DDVP (1  $\mu$ M) or pretreated with iso-OMPA (100  $\mu$ M) and then DDVP, and

1186 parasite viability was measured 5 h after treatment. (C) *smbche1*-silenced or *luc* siRNA-treated  
1187 schistosomula were treated with DDVP (1  $\mu$ M) and parasite viability was measured 5 h after  
1188 treatment. (D) Schistosomula extracts were pre-incubated with fSmBChE1 (10  $\mu$ g) then treated  
1189 with DDVP (1  $\mu$ M), or treated with DDVP alone, before assaying AChE activity. (E) DDVP  
1190 was pre-incubated with fSmBChE1 (10, 5 and 2.5  $\mu$ g) or 10  $\mu$ g of *SmTSP2* for 1 h before being  
1191 used to treat schistosomula. Parasite viability was measured 24 h post-treatment. For all assays,  
1192 data are the average of triplicate biological and technical experiments  $\pm$  SEM and differences  
1193 were measured by the student's *t* test. \* $P \leq 0.05$ , \*\*\* $P \leq 0.001$ , \*\*\*\* $P \leq 0.0001$ .

1194

## 1195 Supporting information

1196 **Figure S1. Regional amino acid sequence alignment of SmBChE1 and its human and**  
1197 **other helminth homologs.** Accession numbers: *Schistosoma mansoni* (*SmBChE1* –  
1198 *Smp\_125350*), *Schistosoma rodhaini* (*SROB\_0000329201*), *Schistosoma haematobium*  
1199 (*KGB33101*), *Schistosoma japonicum* (*Sjp\_0015690*), *Clonorchis sinensis*  
1200 (*csin111679*), *Echinostoma caproni* (*ECPE\_0000670801*), *Fasciola hepatica* (*PIS83327.1*),  
1201 *Hymenolepis diminuta* (*HDID\_0000005301*), *Echinococcus granulosus* (*EGR\_07475.1*),  
1202 *Taenia solium* (*TsM\_000234300*), *Taenia saginata* (*TSAs00071g07627m00001*), *Trichuris*  
1203 *muris* (*TMUE\_3000012587*), *Trichuris trichiura* (*TTRE\_0000364501*), *Trichuris suis*  
1204 (*M514\_03850*), *Nippostrongylus brasiliensis* (*NBR\_0000102801*), *Caenorhabditis elegans*  
1205 (*Y48B6A.8.1*). Red box = catalytic triad residue.

1206

1207 **Figure S2. Magnified view of 3D models showing the catalytic triads of SmAChE1,**  
1208 **SmBChE1, and SmAChE3.** The amino acid residues of the catalytic triad of each paralog are

1209 magnified and their position number is given according to *Torpedo* AChE numbering:  
1210 *SmAChE1* (Ser277, Gln538, Glu406), *SmBChE1* (Ser244, Gln538, Glu406), and *SmAChE3*  
1211 (Ser239, His514, Glu375).

1212

1213 **Figure S3. Relationship between *SmChEs* and other invertebrate and vertebrate species.**

1214 Evolutionary history was inferred using the Neighbor-Joining method and the phylogenetic tree  
1215 was generated using a ClustalW alignment. The evolutionary distances were computed using  
1216 the Poisson correction method and are in the units of the number of amino acid substitutions  
1217 per site. All positions containing gaps and missing data were eliminated, making for a total of  
1218 236 positions in the final dataset. The three *SmChEs* are indicated by bold font inside a red box.

1219 Accession numbers: *Schistosoma mansoni* (**Sm\_AChE1** - Smp\_154600, **Sm\_BChE1** -  
1220 Smp\_125350, **Sm\_AChE3** - Smp\_136690); *Schistosoma bovis* (Sb\_AChE1 - AAQ14323);  
1221 *Schistosoma haematobium* (Sh\_AChE1 - AAQ14322, Sh\_AChE2 - KGB33101, Sh\_AChE3 -  
1222 KGB33661); *Schistosoma japonicum* (Sj\_AChE1 - ANH56887, Sj\_AChE2 - Sjp0045440.1);  
1223 *Clonorchis sinensis* (Cs\_AChE1 - GAA52478, Cs\_AChE2 - GAA53463, Cs\_AChE3 -  
1224 GAA27255); *Opisthorchis viverrini* (Ov\_AChE - XP009170845, Ov\_AChE - XP009168237,  
1225 Ov\_AChE - XP009170760); *Echinococcus granulosus* (Eg\_AChE1 - JN662938, Eg\_AChE2 -  
1226 EgG000732400); *Hymenolepis microstoma* (Hm\_AChE1 - LK053025); *Taenia solium*  
1227 (Ts\_AChE1 - TsM000234300, Ts\_AChE - TsM001220100, Ts\_AChE - TsM000001700);  
1228 *Anopheles gambiae* (Ag\_AChE1 - AGM16375); *Aedes aegypti* (Ae\_AChE - AAB35001);  
1229 *Culex tritaeniorhynchus* (Ct\_AChE - BAD06210); *Caenorhabditis elegans* (Ce\_AChE1 -  
1230 NP510660, Ce\_AChE2 - NP491141, Ce\_AChE3 - NP496963); *Trichuris muris* (Tm\_AChE1  
1231 - TMUEs0033000600); *Nippostrongylus brasiliensis* (Nb\_AChE1 - AAK44221, Nb\_AChE2 -  
1232 AAC05785, Nb\_AChE3 - AAK44221); *Homo sapiens* (Hs\_AChE - NP000656); *Torpedo*



1233 *californica* (Tc\_AChE - CAA27169); *Danio rerio* (Dr\_AChE - NP571921); *Mus musculus*  
1234 (Mm\_AChE - CAA39867); *Rattus norvegicus* (Rn\_AChE - NP742006).

1235

1236 **Figure S4. Phylogenetic analysis of *SmBChE1* and its human and other helminth**  
1237 **homologs.** The phylogenetic tree was built using the maximum likelihood method with  
1238 *SmBChE1* and the top 16 helminth ChE homologs identified from the BLASTp search, as well  
1239 as human BChE. Accession numbers: *Schistosoma mansoni* (*SmBChE1* – Smp\_125350),  
1240 *Schistosoma rodhaini* (SROB\_0000329201), *Schistosoma haematobium* (KGB33101),  
1241 *Schistosoma japonicum* (Sjp\_0015690), *Clonorchis sinensis* (csin111679), *Echinostoma*  
1242 *caproni* (ECPE\_0000670801), *Fasciola hepatica* (PIS83327.1), *Hymenolepis diminuta*  
1243 (HDID\_0000005301), *Echinococcus granulosus* (EGR\_07475.1), *Taenia solium*  
1244 (TsM\_000234300), *Taenia saginata* (TSAs00071g07627m00001), *Trichuris muris*  
1245 (TMUE\_3000012587), *Trichuris trichiura* (TTRE\_0000364501), *Trichuris suis*  
1246 (M514\_03850), *Nippostrongylus brasiliensis* (NBR\_0000102801), *Caenorhabditis elegans*  
1247 (Y48B6A.8.1).

1248

1249 **Figure S5. Transcript levels of glucose transporters *sgtp1* and *sgtp4* and each *smche* in**  
1250 **individual and cocktail *smche* siRNA-treated schistosomula.** Transcript levels of each  
1251 *smche* and *sgtp* in parasites treated with *smche* siRNAs are shown relative to *smche* transcript  
1252 expression in schistosomula treated with the *luc* control siRNA (dashed line) and represent the  
1253 mean  $\pm$  SEM of triplicate qPCR assays from 2 biological replicates of each treatment).  
1254 Transcript expression in all parasites was normalized with the housekeeping gene, *smcox1*.  
1255 Differences in transcript levels (relative to the *luc* control) were measured by the student's *t*  
1256 test. \* $P \leq 0.05$ , \*\* $P \leq 0.01$ , \*\*\* $P \leq 0.001$ .



1257 **Table S1. Primers used in this study**

| Gene                                                    | Direction | Primer Sequence                       |
|---------------------------------------------------------|-----------|---------------------------------------|
| <b><i>Full-length ORF expression in P. pastoris</i></b> |           |                                       |
| <i>fsmache1</i>                                         | Fwd       | GAATTCGCGGCCGCGAATTC                  |
|                                                         | Rev       | TCTAGAGGTCTAGAGCTCGAG                 |
| <i>fsmbche1</i>                                         | Fwd       | GAATTCGCGGCCGCGAATTC                  |
|                                                         | Rev       | TCTAGAGGTCTAGAGCTCGAG                 |
| <i>fsmache3</i>                                         | Fwd       | GAATTCGCGGCCGCGAATTC                  |
|                                                         | Rev       | TCTAGAGGTCTAGAGCTCGAG                 |
| <b><i>Partial ORF expression in E. coli</i></b>         |           |                                       |
| <i>rsmache1</i>                                         | Fwd       | GACAGAAACCACATGATGTTGGAA              |
|                                                         | Rev       | TTCCAACATCATGTGGTTTCTGTC              |
| <i>rsmbche1</i>                                         | Fwd       | TCCAGGAAGCACATGGTCTTCACT              |
|                                                         | Rev       | AGTGAAGACCATGTGCTTCTGGA               |
| <i>rsmache3</i>                                         | Fwd       | CGCCATATGCTCTCAAAGCGTGGTACT           |
|                                                         | Rev       | CGCCTCGAGCGGATCCCAACTTAGTCTCATC       |
| <b><i>qPCR</i></b>                                      |           |                                       |
| <i>smache1</i>                                          | Fwd       | ATGGATATGAGATTGAGTATG                 |
|                                                         | Rev       | CTGGAAGGATGTTAGGAT                    |
| <i>smbche1</i>                                          | Fwd       | CTACTCGTAATGATGACT                    |
|                                                         | Rev       | GGCTGAATTATACAAGATT                   |
| <i>smache3</i>                                          | Fwd       | ATGCGACCACACTATCACCA                  |
|                                                         | Rev       | CCTGATGTAAATCCACCACCA                 |
| <i>sgtp1</i>                                            | Fwd       | CTGCAGCTTATTCAGTCAATC                 |
|                                                         | Rev       | CCACCGATGTTTTTCTGTATAACAGGAT          |
| <i>sgtp4</i>                                            | Fwd       | AGCCAAGGAGTTAACTTATTATGCAATTTATTG     |
|                                                         | Rev       | TCCAACAGATAATAACGATAACTAAAAATGGTAAGAA |
| <i>smcox1</i>                                           | Fwd       | TAGGGTTGGTGGTGTACAG                   |
|                                                         | Rev       | ACGGCCATCACCATACTAGC                  |

1258

1259

1260

1261

1262 **Table S2. Target sequences used to design siRNA duplexes**

| Gene           | Target sequence for siRNA duplex |
|----------------|----------------------------------|
| <i>smache1</i> | CAGGAGCTTTAATGTTTGGCA            |
| <i>smbche1</i> | GTATCATCTTGTACAAAGTTTAAGA        |
| <i>smache3</i> | CATCAAACCAATTGGTAAATTACGT        |
| <i>luc</i>     | ACTGAGACTACATCAGCTATTCTGAT       |

1263

1264

1265

1266 **Table S3. Identification by LC-MS/MS of *SmChEs* purified from adult *S. mansoni* ES**

1267 **products**

| Accession number <sup>a</sup>      | Score | Seq(Sig) <sup>b</sup> | emPAI <sup>c</sup> | Protein sequences                                                                                                                                                                                                |
|------------------------------------|-------|-----------------------|--------------------|------------------------------------------------------------------------------------------------------------------------------------------------------------------------------------------------------------------|
| Smp_154600.1<br>( <i>SmAChE1</i> ) | 15457 | 19                    | 4.64               | SFKCPTINMATAVTNDYR<br>CPTINMATAVTNDYR<br>RAHTLPVYFYEFQHR<br>AHTLPVYFYEFQHR<br>TVSLPMPK<br>QLSDIMMTYWANFAR<br>TGDPNILPDGR<br>HVTDNLPDDPDEITEDQLK<br>NPFIEWPEFR<br>NPFIEWPEFRNSTK<br>SAPANLLVSTRPR<br>RWYPALLQQVER |
| Smp_125350.1<br>( <i>SmBChE1</i> ) | 89    | 2                     | 0.18               | ALGTGSWTSLEVVK<br>YETYSPPHSVATR                                                                                                                                                                                  |

1268 <sup>a</sup> identified from Uniprot database.

1269 <sup>b</sup> number of significant, distinct sequences

1270 <sup>c</sup> exponentially modified protein abundance index

1271

1272

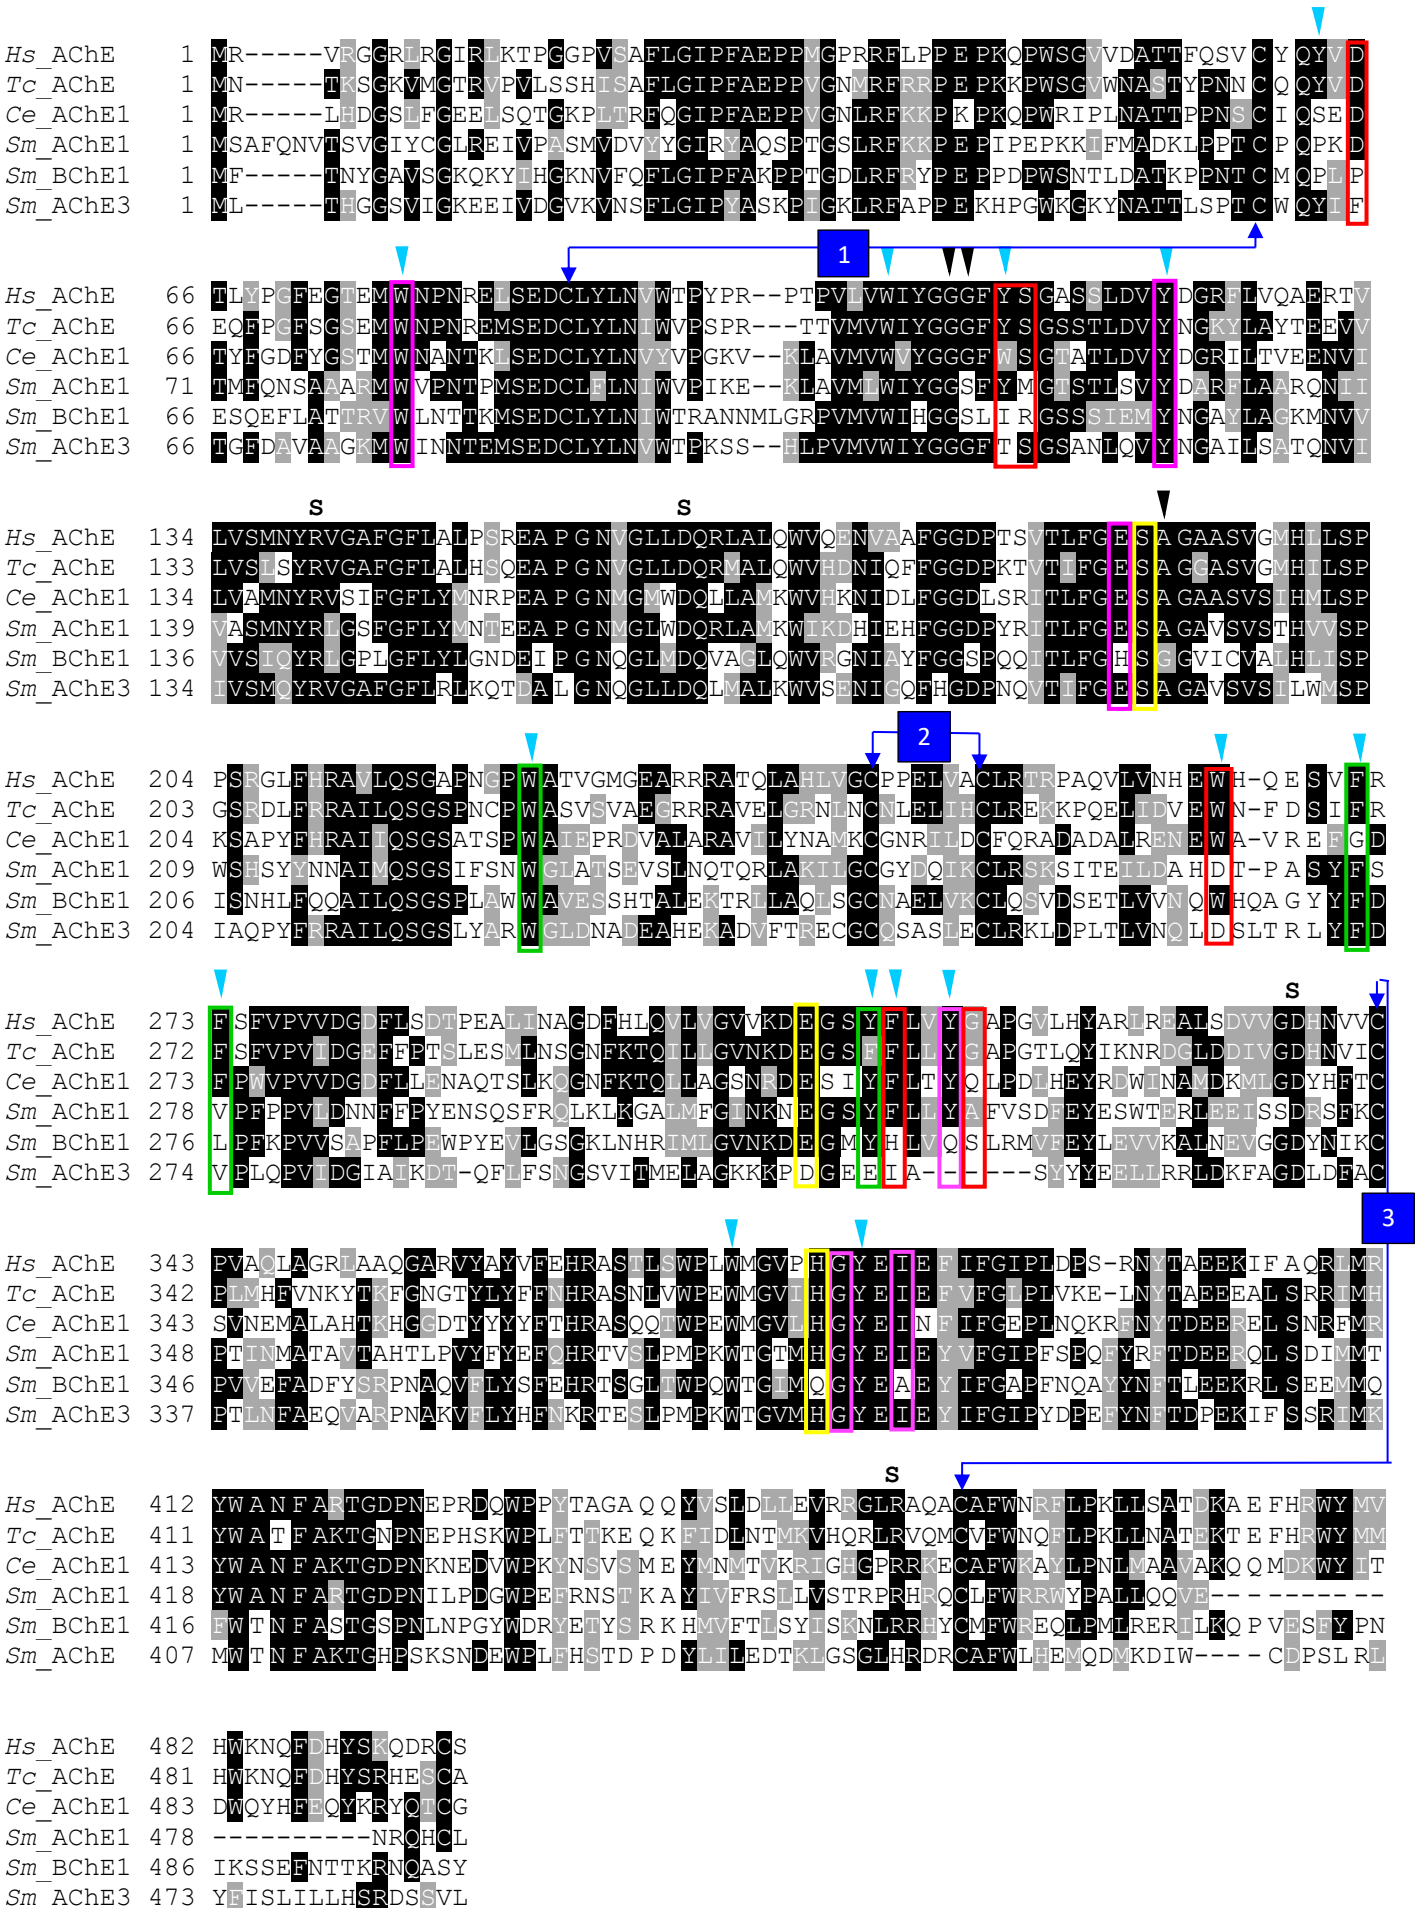

**Figure 2**

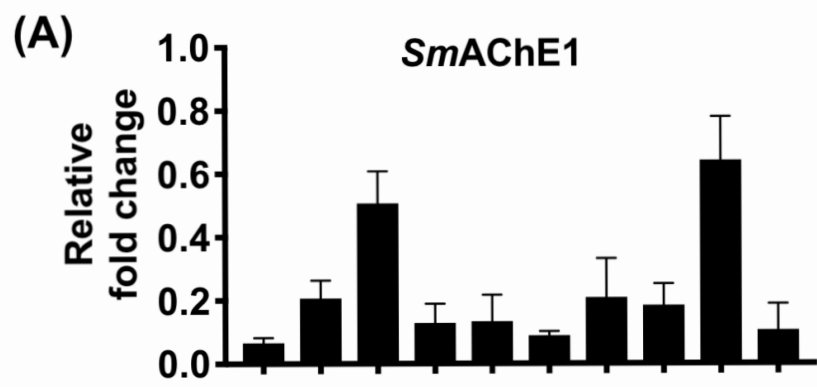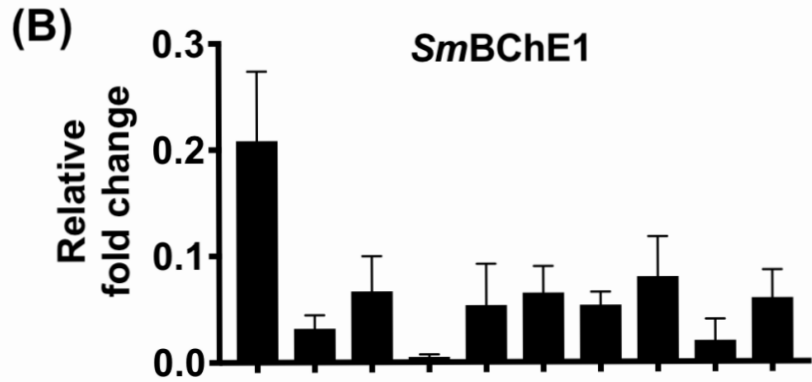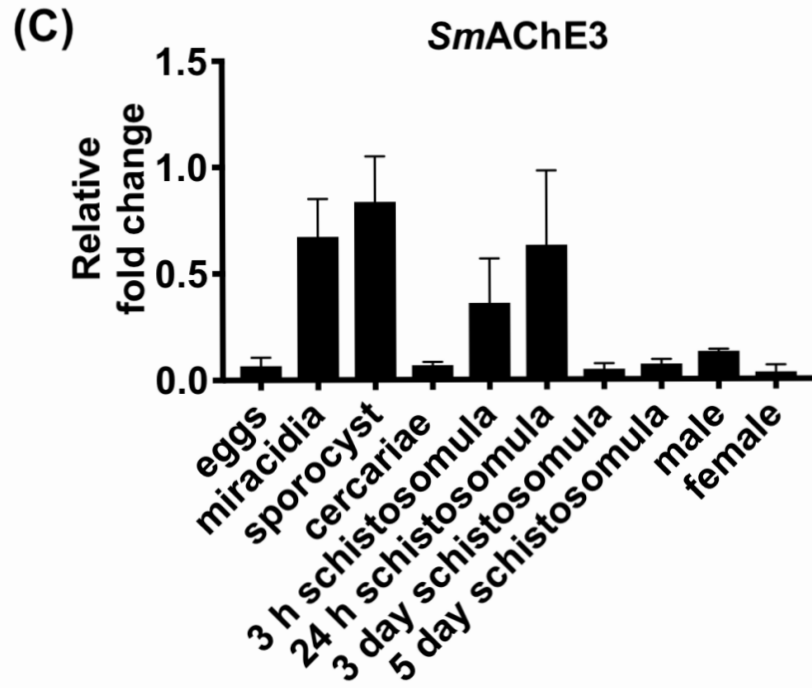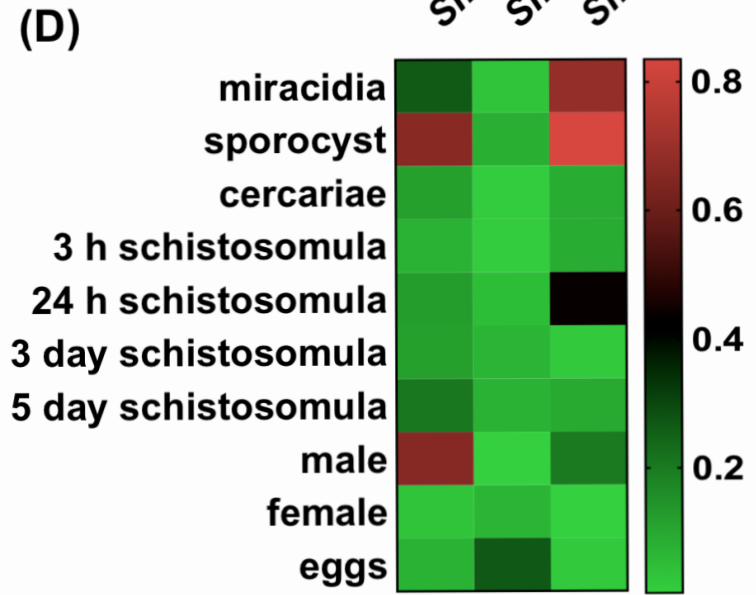

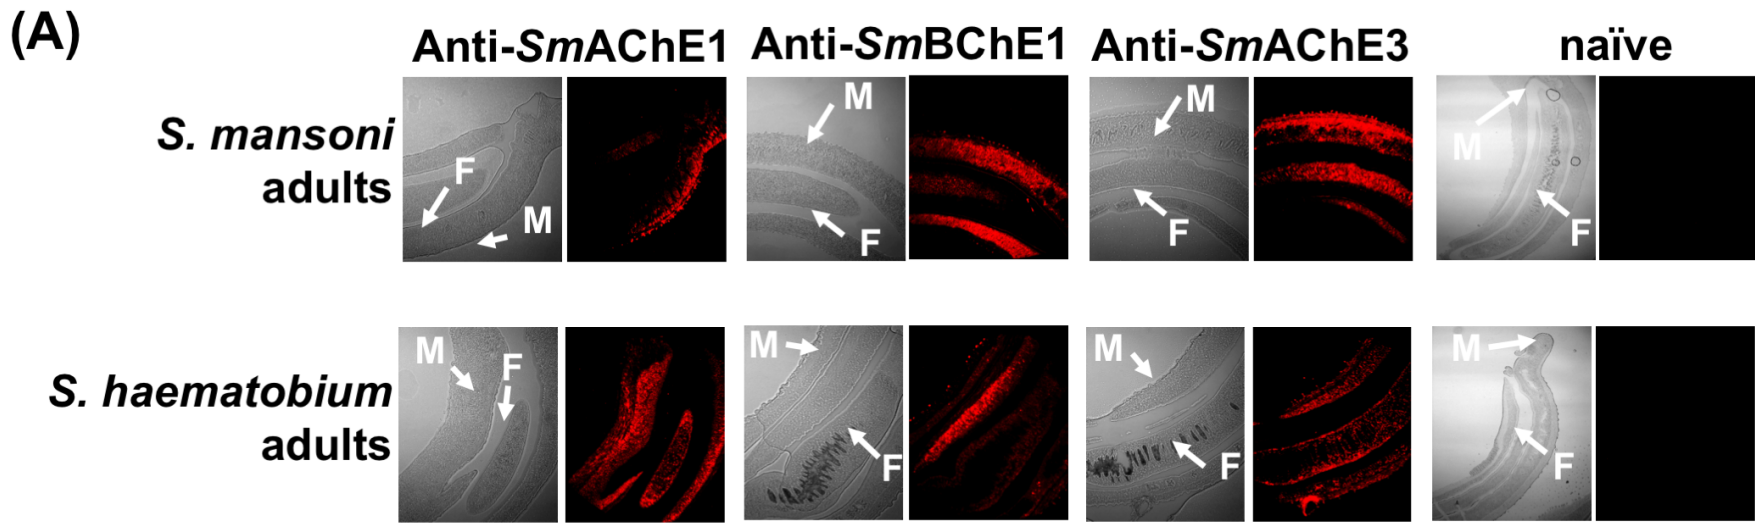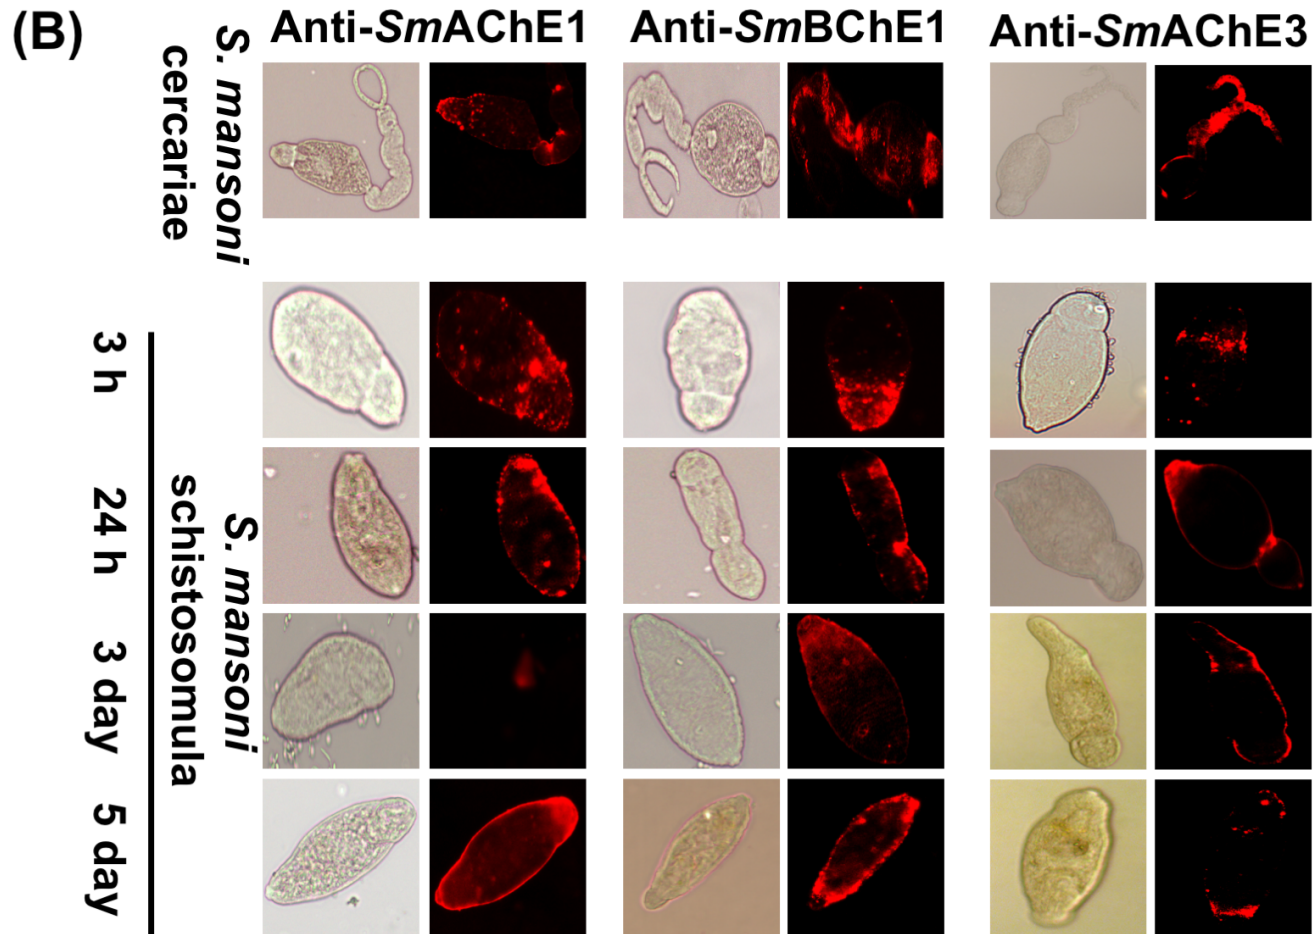

figure 4

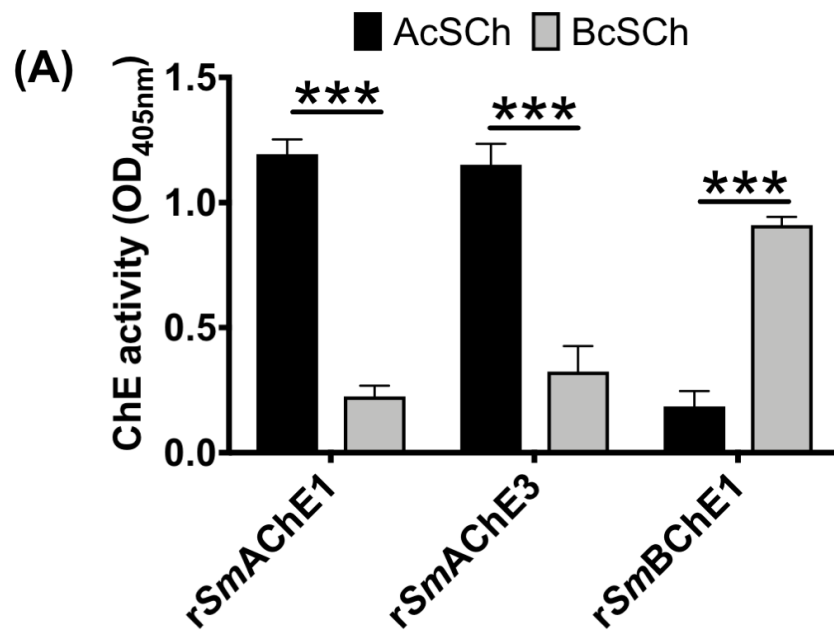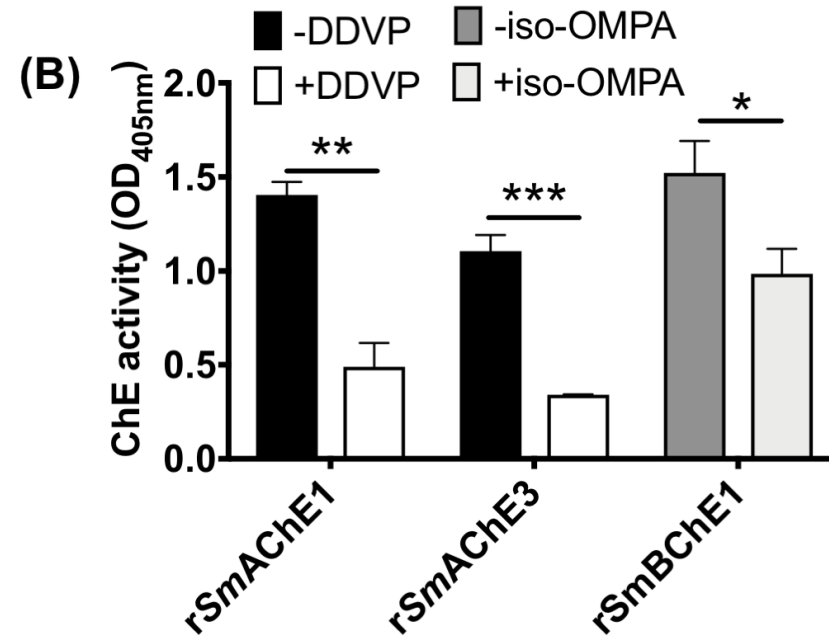



figure 5

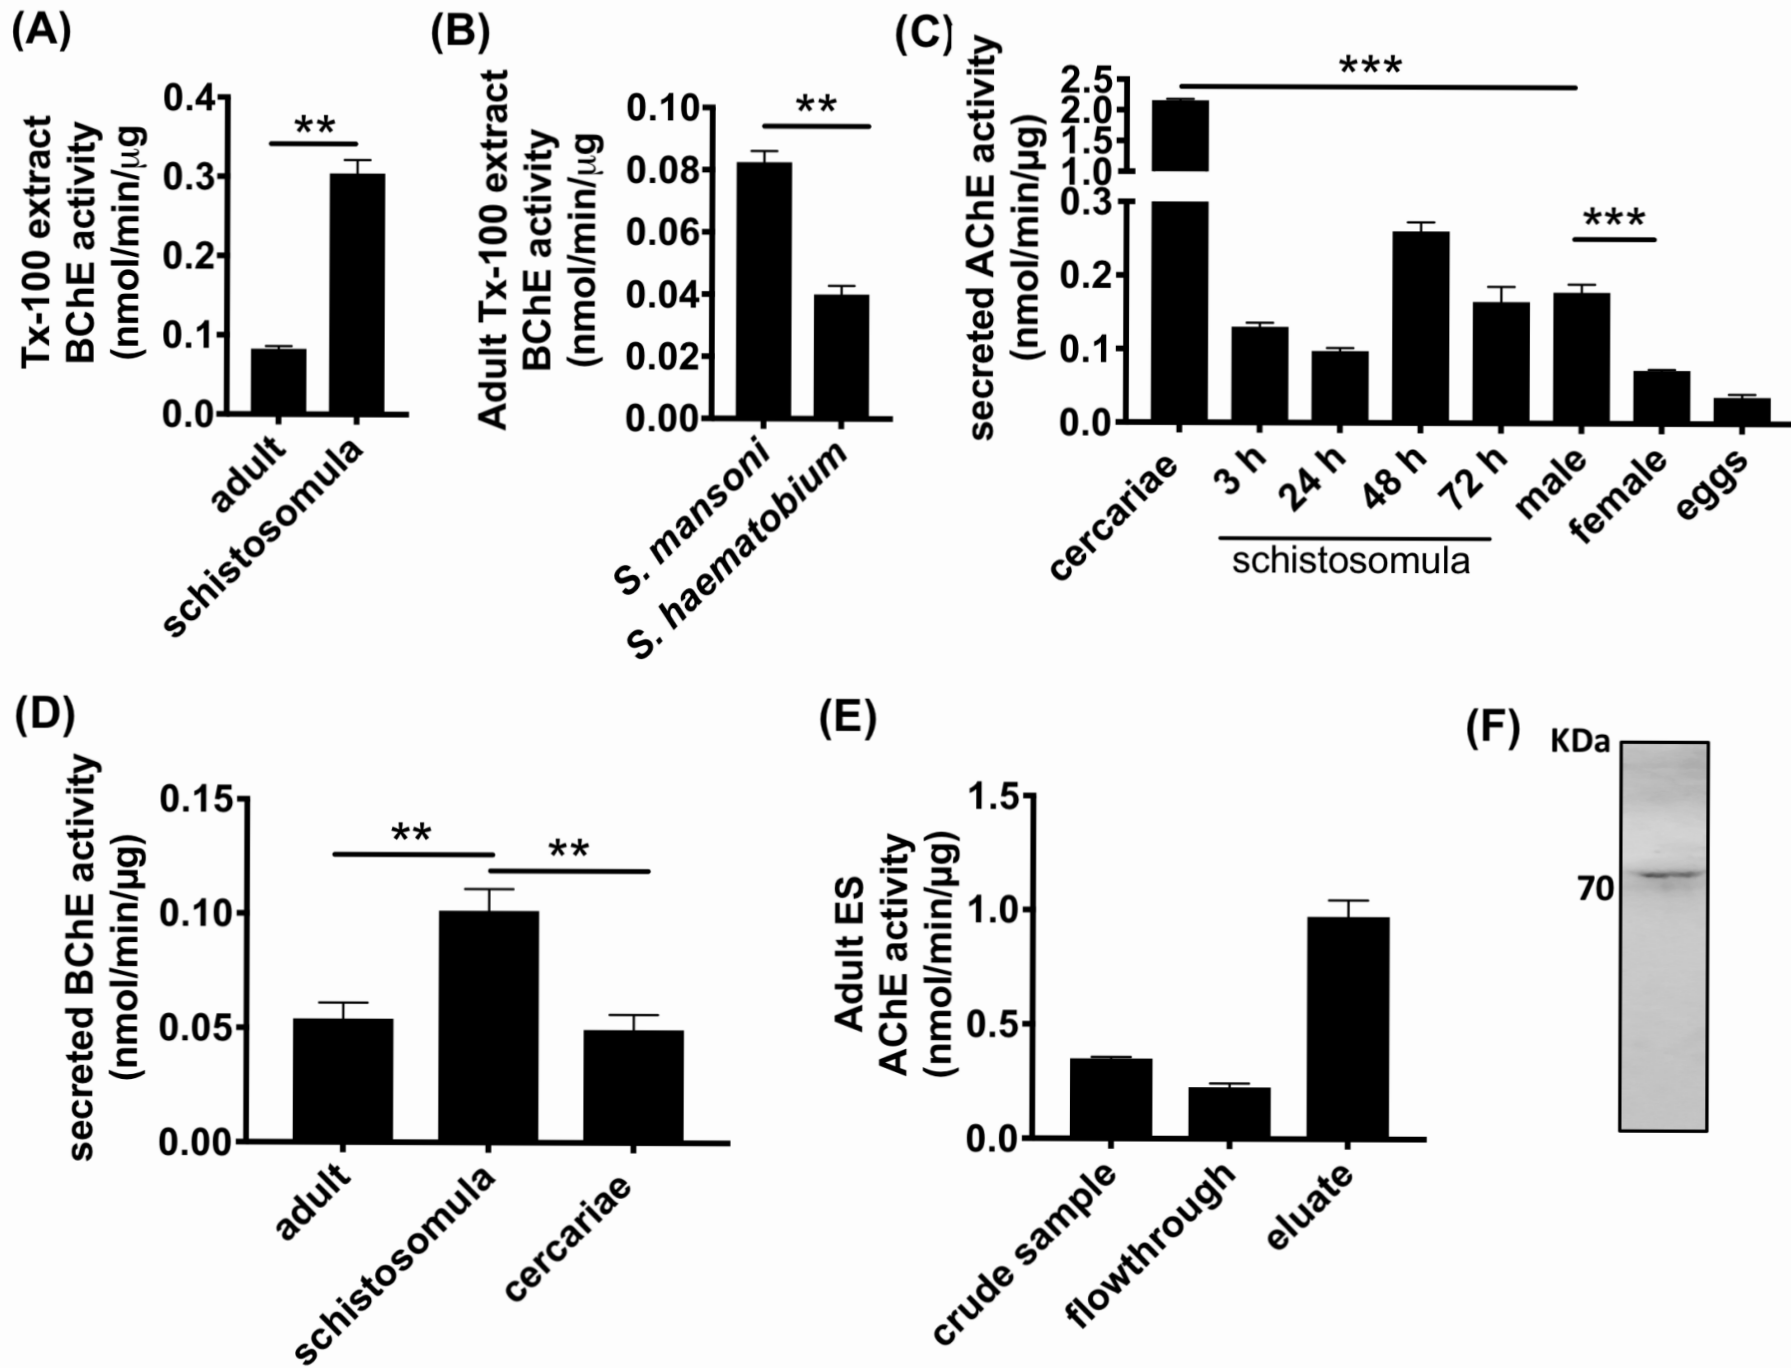



figure 6 (A)

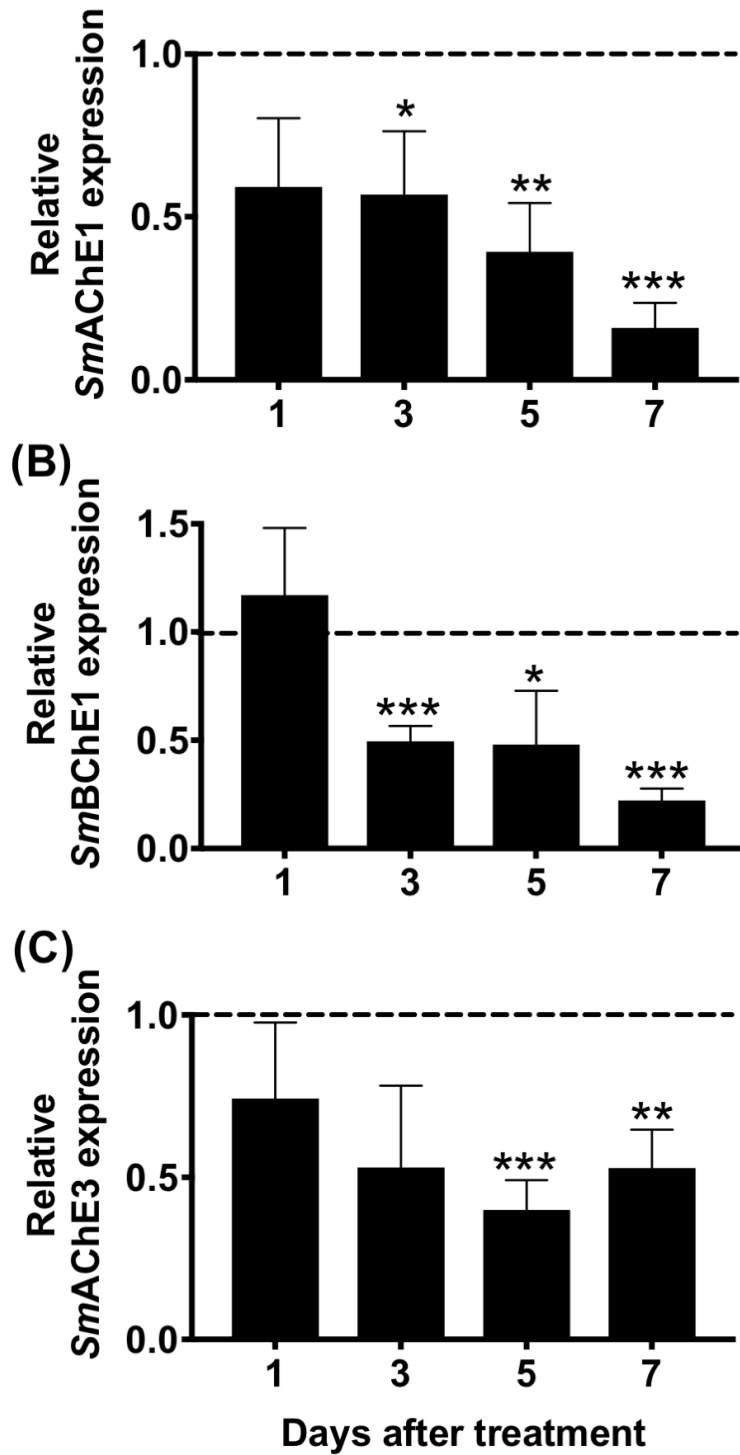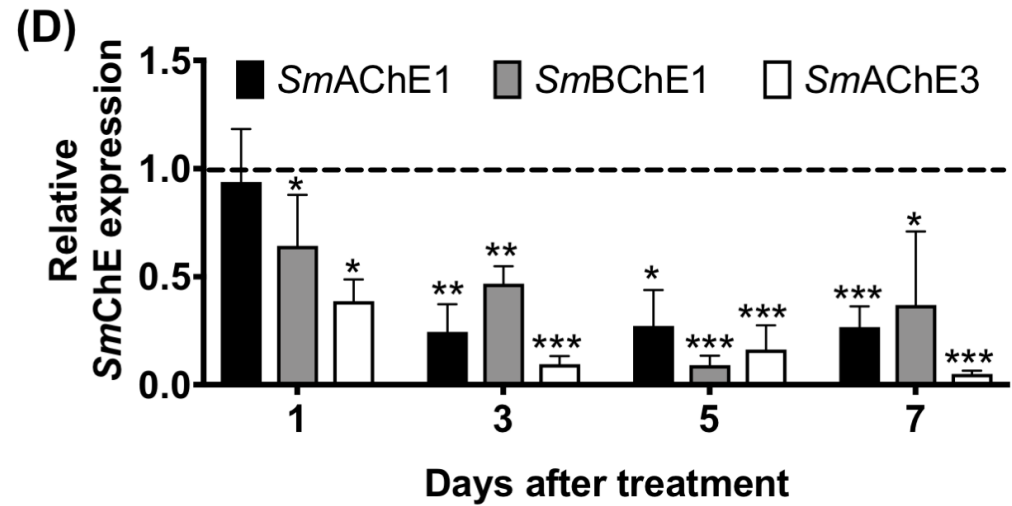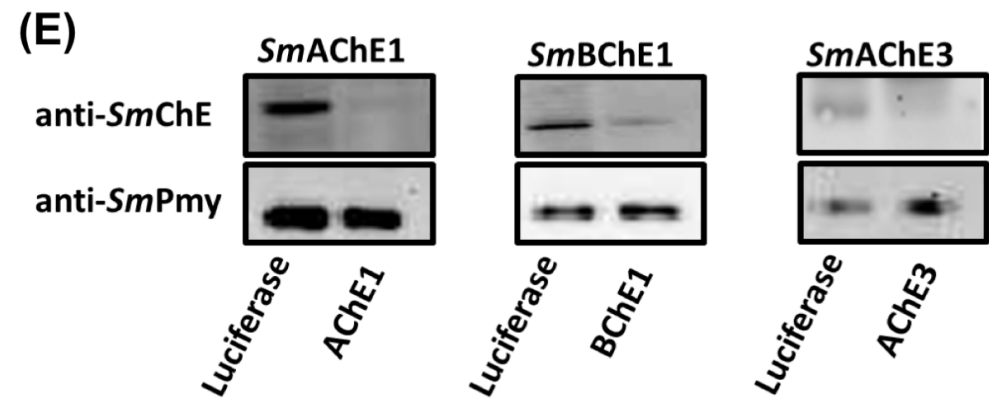

figure 7

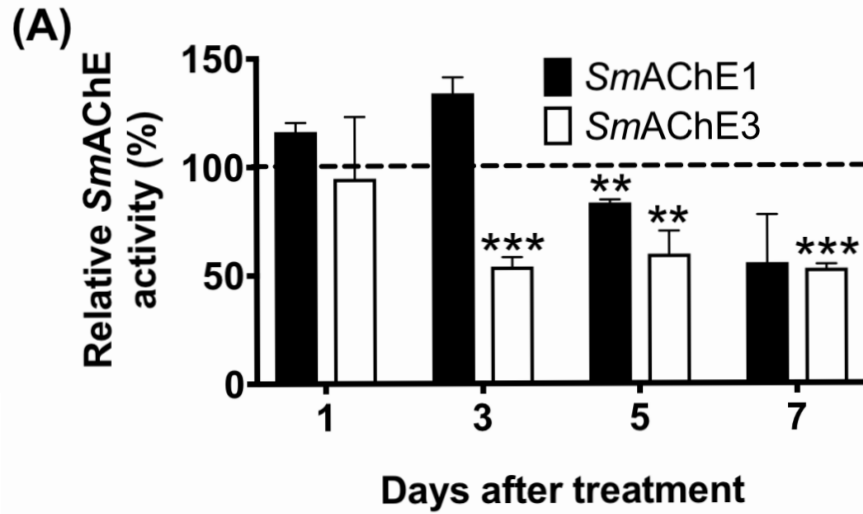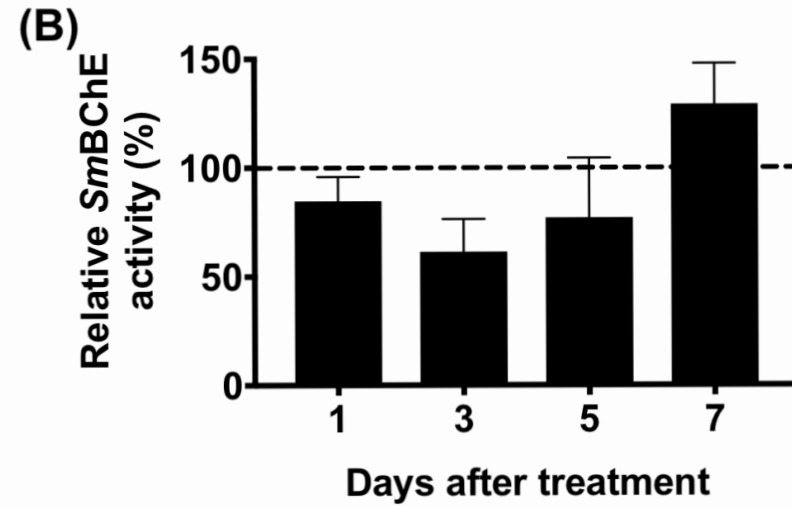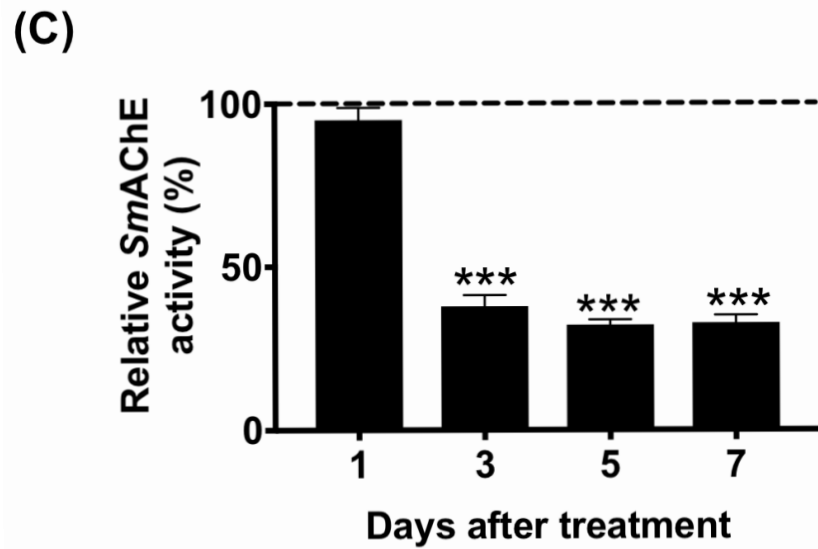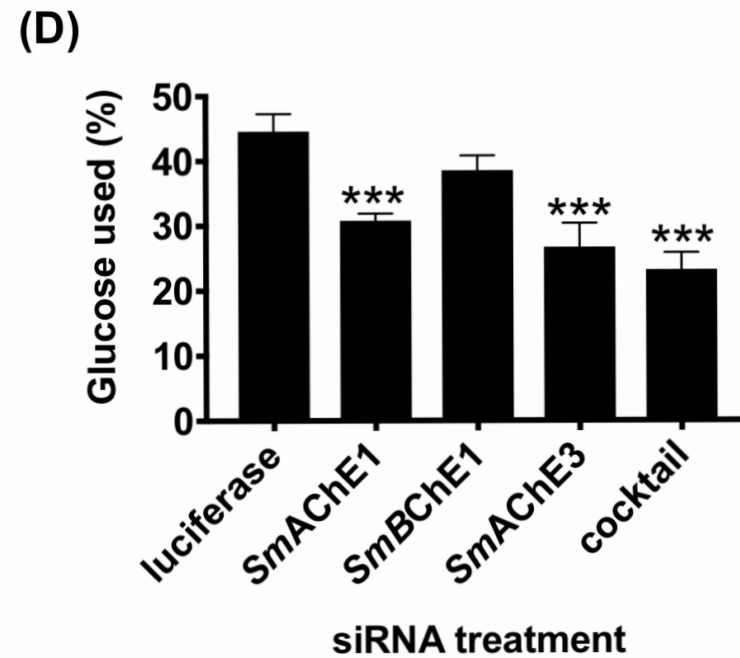

figure 8

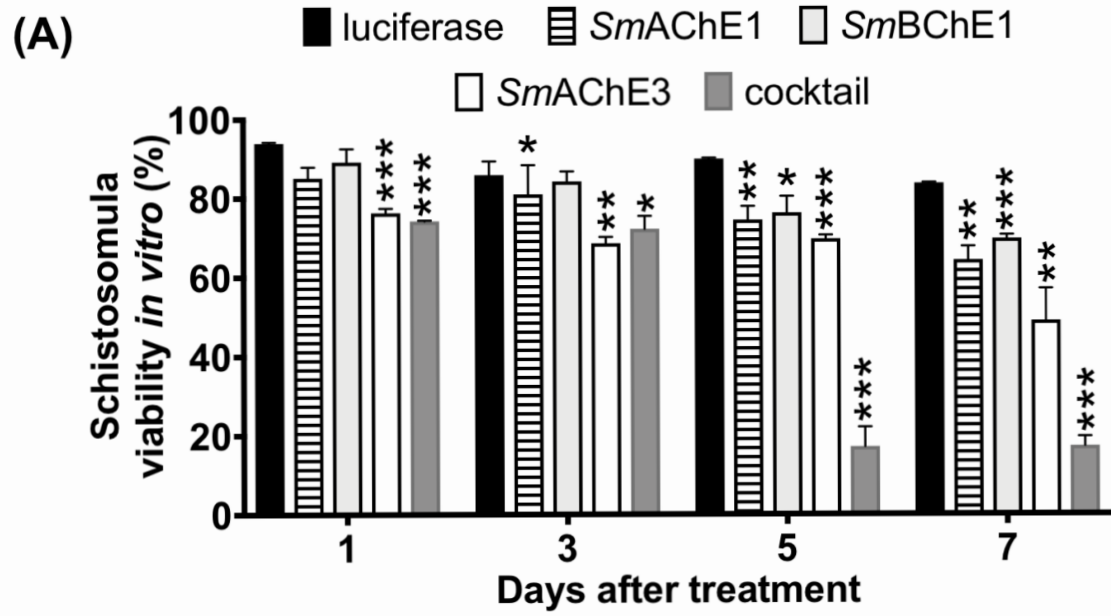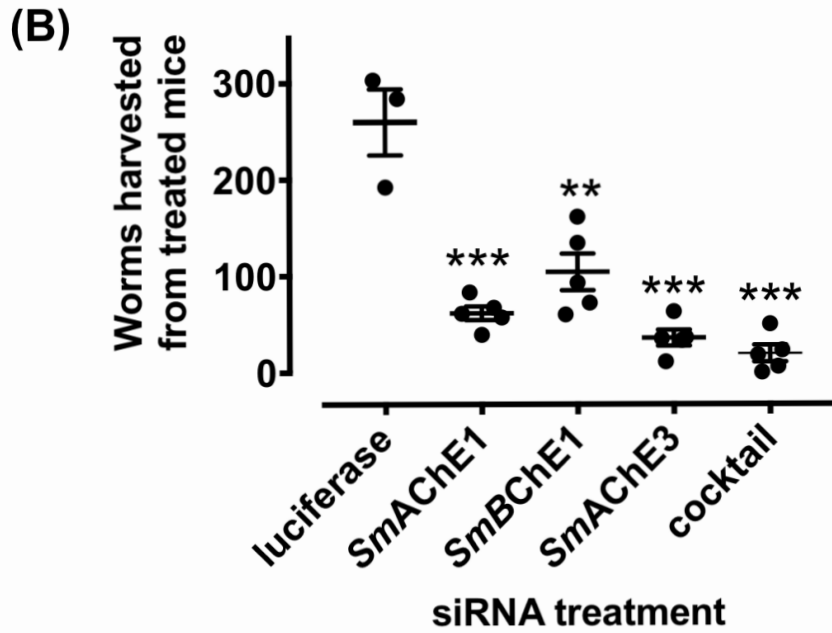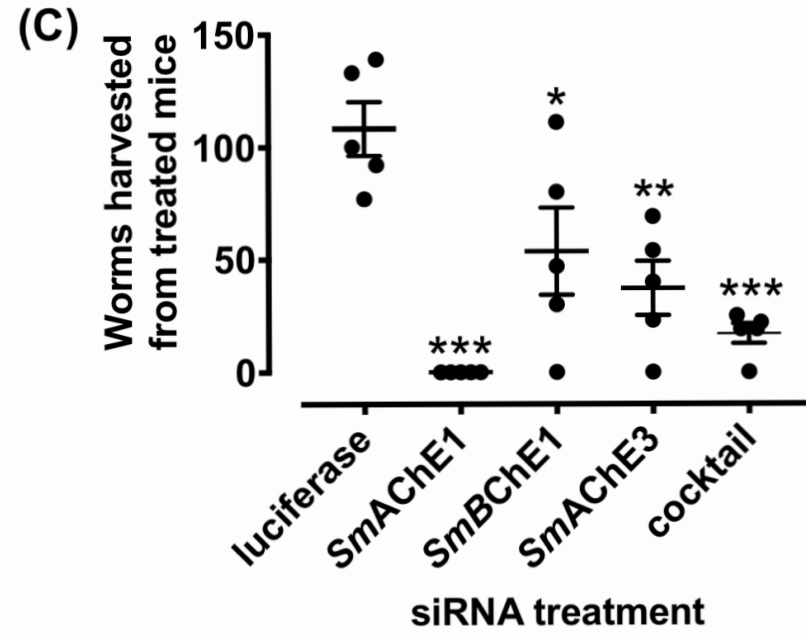

figure 9

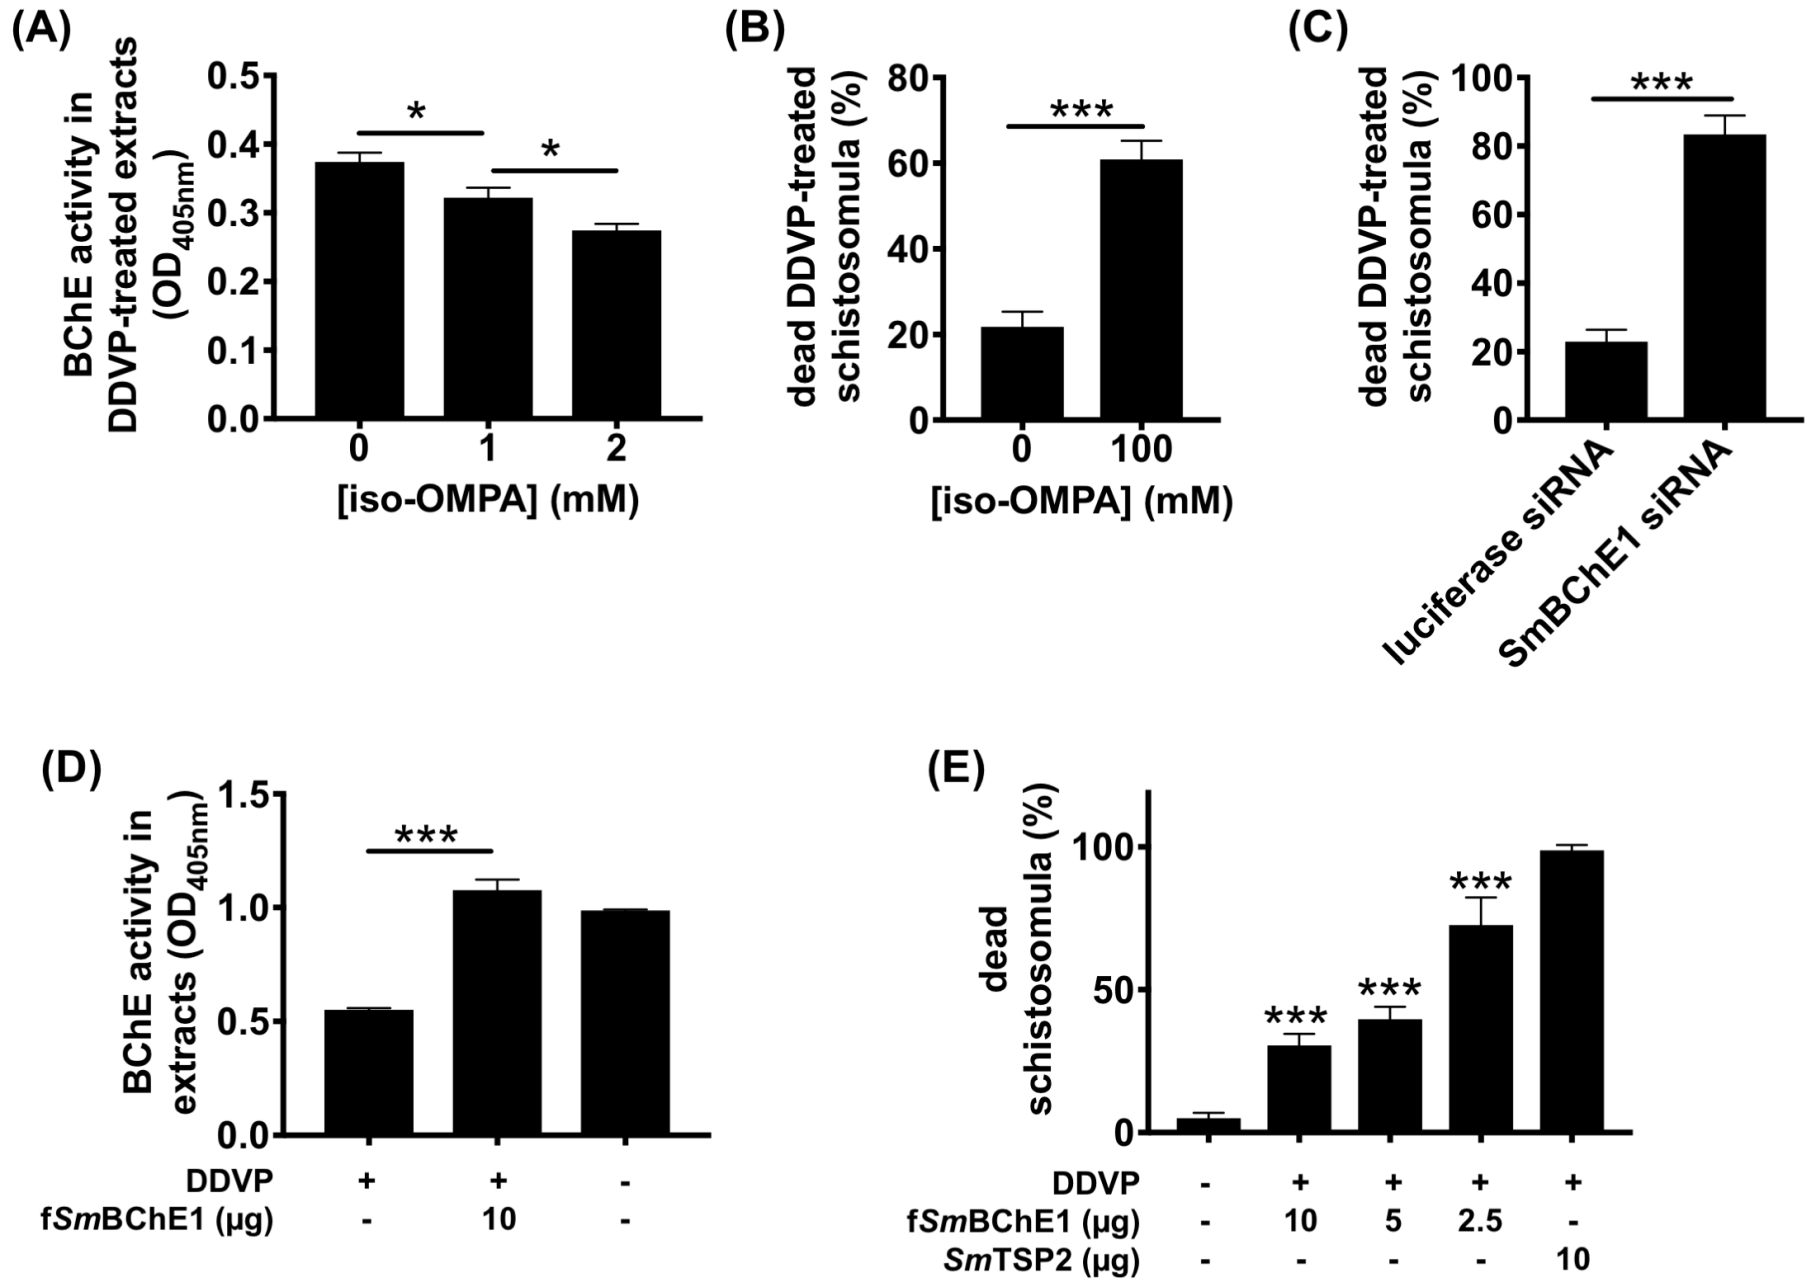

Source: https://biorxiv.org/content/biorxiv/early/2019/03/21/583658.full-text.pdf
